# Supplementary material for: Elicitation with Bacillus QV15 reveals a pivotal role of F3H on flavonoid metabolism improving adaptation to biotic stress in blackberry
Source: PubMed Central journal article supplement (PMC7202615; doi:10.1371/journal.pone.0232626), 2020-05-06

# PLOS ONE

## Elicitation with *Bacillus* QV15 reveals a pivotal role of F3H on flavonoid metabolism improving adaptation to biotic stress in blackberry

--Manuscript Draft--

|                                                                                                                                                                                                                                                                                                                             |                                                                                                                                                                                                                                                                                                                                                                                                                                                                                                                                                                                                                                                                                                                                                                                                                                                                                                                                                                                                                                                                                                                                                                                                                                                                                                                                                                                                                                                                                                      |
|-----------------------------------------------------------------------------------------------------------------------------------------------------------------------------------------------------------------------------------------------------------------------------------------------------------------------------|------------------------------------------------------------------------------------------------------------------------------------------------------------------------------------------------------------------------------------------------------------------------------------------------------------------------------------------------------------------------------------------------------------------------------------------------------------------------------------------------------------------------------------------------------------------------------------------------------------------------------------------------------------------------------------------------------------------------------------------------------------------------------------------------------------------------------------------------------------------------------------------------------------------------------------------------------------------------------------------------------------------------------------------------------------------------------------------------------------------------------------------------------------------------------------------------------------------------------------------------------------------------------------------------------------------------------------------------------------------------------------------------------------------------------------------------------------------------------------------------------|
| <b>Manuscript Number:</b>                                                                                                                                                                                                                                                                                                   | PONE-D-19-31790                                                                                                                                                                                                                                                                                                                                                                                                                                                                                                                                                                                                                                                                                                                                                                                                                                                                                                                                                                                                                                                                                                                                                                                                                                                                                                                                                                                                                                                                                      |
| <b>Article Type:</b>                                                                                                                                                                                                                                                                                                        | Research Article                                                                                                                                                                                                                                                                                                                                                                                                                                                                                                                                                                                                                                                                                                                                                                                                                                                                                                                                                                                                                                                                                                                                                                                                                                                                                                                                                                                                                                                                                     |
| <b>Full Title:</b>                                                                                                                                                                                                                                                                                                          | Elicitation with <i>Bacillus</i> QV15 reveals a pivotal role of F3H on flavonoid metabolism improving adaptation to biotic stress in blackberry                                                                                                                                                                                                                                                                                                                                                                                                                                                                                                                                                                                                                                                                                                                                                                                                                                                                                                                                                                                                                                                                                                                                                                                                                                                                                                                                                      |
| <b>Short Title:</b>                                                                                                                                                                                                                                                                                                         | F3H plays a pivotal role on flavonoid metabolism in blackberry                                                                                                                                                                                                                                                                                                                                                                                                                                                                                                                                                                                                                                                                                                                                                                                                                                                                                                                                                                                                                                                                                                                                                                                                                                                                                                                                                                                                                                       |
| <b>Corresponding Author:</b>                                                                                                                                                                                                                                                                                                | Beatriz Ramos-Solano<br>Universidad CEU San Pablo<br>Boadilla del Monte, Madrid SPAIN                                                                                                                                                                                                                                                                                                                                                                                                                                                                                                                                                                                                                                                                                                                                                                                                                                                                                                                                                                                                                                                                                                                                                                                                                                                                                                                                                                                                                |
| <b>Keywords:</b>                                                                                                                                                                                                                                                                                                            | Blackberry; flavonol-anthocyanin pathway; <i>Bacillus amyloliquefaciens</i> ; flavonol-3-hydroxylase; PGPR; plant adaptation; biotic stress; photosynthetic pigments; elicitation                                                                                                                                                                                                                                                                                                                                                                                                                                                                                                                                                                                                                                                                                                                                                                                                                                                                                                                                                                                                                                                                                                                                                                                                                                                                                                                    |
| <b>Abstract:</b>                                                                                                                                                                                                                                                                                                            | The aim of this study is to determine the involvement of the flavonol-anthocyanin pathway on plant adaptation to biotic stress using the <i>Bacillus amyloliquefaciens</i> QV15 to trigger blackberry metabolism and identify target genes to improve plant fitness and fruit quality. To achieve this goal, field-grown blackberries were root-inoculated with QV15 along its growth cycle. At fruiting, a transcriptomic analysis by RNA-Seq was performed on leaves and fruits of treated and non-treated field-grown blackberries after a sustained mildew outbreak; expression of the regulating and core genes of the Flavonol-Anthocyanin pathway were analysed by qPCR and metabolomic profiles by UHPLC/ESI-qTOF-MS; plant protection was found to be up to 88%. Overexpression of step-controlling genes in leaves and fruits, associated to lower concentration of flavonols and anthocyanins in QV15-treated plants, together with a higher protection suggest a phytoanticipin role for flavonols in blackberry; kempferol-3-rutinoside concentration was strikingly high. Overexpression of RuF3H (Flavonol-3-hydroxylase) suggests a pivotal role in the coordination of committing steps in this pathway, controlling carbon flux towards the different sinks. Furthermore, this C demand is supported by an activation of the photosynthetic machinery, and boosted by a coordinated control of ROS into a sub-lethal range, and associated to enhanced protection to biotic stress |
| <b>Order of Authors:</b>                                                                                                                                                                                                                                                                                                    | Enrique Gutierrez-Albanchez<br>Ana Gradillas<br>Antonia García<br>Ana Garcia-Villaraco<br>Francisco Javier Gutierrez-Mañero<br>Beatriz Ramos-Solano                                                                                                                                                                                                                                                                                                                                                                                                                                                                                                                                                                                                                                                                                                                                                                                                                                                                                                                                                                                                                                                                                                                                                                                                                                                                                                                                                  |
| <b>Additional Information:</b>                                                                                                                                                                                                                                                                                              |                                                                                                                                                                                                                                                                                                                                                                                                                                                                                                                                                                                                                                                                                                                                                                                                                                                                                                                                                                                                                                                                                                                                                                                                                                                                                                                                                                                                                                                                                                      |
| <b>Question</b>                                                                                                                                                                                                                                                                                                             | <b>Response</b>                                                                                                                                                                                                                                                                                                                                                                                                                                                                                                                                                                                                                                                                                                                                                                                                                                                                                                                                                                                                                                                                                                                                                                                                                                                                                                                                                                                                                                                                                      |
| <b>Financial Disclosure</b><br><br>Enter a financial disclosure statement that describes the sources of funding for the work included in this submission. Review the <a href="#">submission guidelines</a> for detailed requirements. View published research articles from <a href="#">PLOS ONE</a> for specific examples. | This work was supported by grants from the Spanish Ministerio de Economía y Competitividad for projects AGL2013-45189 (BRS, JGM), CTQ2014-55279-R (AG) and grant reference BES-2014-076990 to EGA.<br><br>The funders had no role in study design, data collection and analysis, decision to publish, or preparation of the manuscript                                                                                                                                                                                                                                                                                                                                                                                                                                                                                                                                                                                                                                                                                                                                                                                                                                                                                                                                                                                                                                                                                                                                                               |

This statement is required for submission and **will appear in the published article** if the submission is accepted. Please make sure it is accurate.

#### Unfunded studies

Enter: *The author(s) received no specific funding for this work.*

#### Funded studies

Enter a statement with the following details:

- Initials of the authors who received each award
- Grant numbers awarded to each author
- The full name of each funder
- URL of each funder website
- Did the sponsors or funders play any role in the study design, data collection and analysis, decision to publish, or preparation of the manuscript?
- **NO** - Include this sentence at the end of your statement: *The funders had no role in study design, data collection and analysis, decision to publish, or preparation of the manuscript.*
- **YES** - Specify the role(s) played.

\* typeset

#### Competing Interests

Use the instructions below to enter a competing interest statement for this submission. On behalf of all authors, disclose any [competing interests](#) that could be perceived to bias this work—acknowledging all financial support and any other relevant financial or non-financial competing interests.

This statement **will appear in the published article** if the submission is accepted. Please make sure it is accurate. View published research articles from [PLOS ONE](#) for specific examples.

No authors have competing interests

**NO authors have competing interests**

Enter: *The authors have declared that no competing interests exist.*

**Authors with competing interests**

Enter competing interest details beginning with this statement:

*I have read the journal's policy and the authors of this manuscript have the following competing interests: [insert competing interests here]*

\* typeset

**Ethics Statement**

N/A

Enter an ethics statement for this submission. This statement is required if the study involved:

- Human participants
- Human specimens or tissue
- Vertebrate animals or cephalopods
- Vertebrate embryos or tissues
- Field research

Write "N/A" if the submission does not require an ethics statement.

General guidance is provided below. Consult the [submission guidelines](#) for detailed instructions. **Make sure that all information entered here is included in the Methods section of the manuscript.**

**Format for specific study types**

**Human Subject Research (involving human participants and/or tissue)**

- Give the name of the institutional review board or ethics committee that approved the study
- Include the approval number and/or a statement indicating approval of this research
- Indicate the form of consent obtained (written/oral) or the reason that consent was not obtained (e.g. the data were analyzed anonymously)

**Animal Research (involving vertebrate animals, embryos or tissues)**

- Provide the name of the Institutional Animal Care and Use Committee (IACUC) or other relevant ethics board that reviewed the study protocol, and indicate whether they approved this research or granted a formal waiver of ethical approval
- Include an approval number if one was obtained
- If the study involved *non-human primates*, add *additional details* about animal welfare and steps taken to ameliorate suffering
- If anesthesia, euthanasia, or any kind of animal sacrifice is part of the study, include briefly which substances and/or methods were applied

**Field Research**

Include the following details if this study involves the collection of plant, animal, or other materials from a natural setting:

- Field permit number
- Name of the institution or relevant body that granted permission

**Data Availability**

Authors are required to make all data underlying the findings described fully available, without restriction, and from the time of publication. PLOS allows rare exceptions to address legal and ethical concerns. See the [PLOS Data Policy](#) and [FAQ](#) for detailed information.

Yes - all data are fully available without restriction

A Data Availability Statement describing where the data can be found is required at submission. Your answers to this question constitute the Data Availability Statement and **will be published in the article**, if accepted.

**Important:** Stating 'data available on request from the author' is not sufficient. If your data are only available upon request, select 'No' for the first question and explain your exceptional situation in the text box.

Do the authors confirm that all data underlying the findings described in their manuscript are fully available without restriction?

**Describe where the data may be found in full sentences. If you are copying our sample text, replace any instances of XXX with the appropriate details.**

- If the data are **held or will be held in a public repository**, include URLs, accession numbers or DOIs. If this information will only be available after acceptance, indicate this by ticking the box below. For example: *All XXX files are available from the XXX database (accession number(s) XXX, XXX).*
- If the data are all contained **within the manuscript and/or Supporting Information files**, enter the following: *All relevant data are within the manuscript and its Supporting Information files.*
- If neither of these applies but you are able to provide **details of access elsewhere**, with or without limitations, please do so. For example:

*Data cannot be shared publicly because of [XXX]. Data are available from the XXX Institutional Data Access / Ethics Committee (contact via XXX) for researchers who meet the criteria for access to confidential data.*

*The data underlying the results presented in the study are available from (include the name of the third party*

All relevant data are within the manuscript and its Supporting Information files

*and contact information or URL).*

- This text is appropriate if the data are owned by a third party and authors do not have permission to share the data.

\* typeset

Additional data availability information:

1 **Elicitation with *Bacillus* QV15 reveals a pivotal role of F3H**  
2 **on flavonoid metabolism improving adaptation to biotic stress**  
3 **in blackberry**

4 **Enrique Gutiérrez Albánchez<sup>1\*</sup>, Ana Gradillas<sup>2</sup>, Antonia García<sup>2</sup>, Ana García-**  
5 **Villaraco<sup>1</sup>, F. Javier Gutierrez-Mañero<sup>1</sup>, Beatriz Ramos-Solano<sup>1\*</sup>.**

6 <sup>1</sup>Plant Physiology, Pharmaceutical and Health Sciences Department, Faculty of  
7 Pharmacy, Universidad San Pablo-CEU, Madrid, Spain.

8 <sup>2</sup>Centre for Metabolomics and Bioanalysis, Chemistry and Biochemistry Department,  
9 Faculty of Pharmacy, Universidad San Pablo-CEU, Madrid, Spain

10 Universidad San Pablo CEU, Facultad de Farmacia, Carretera de Boadilla del Monte  
11 km. 5.3, 28668, Boadilla del Monte, Madrid, Spain

12 \*Corresponding author

13 Email: [bramsol@ceu.es](mailto:bramsol@ceu.es) (BRS)

14

## 15 **Abstract**

16 The aim of this study is to determine the involvement of the flavonol-anthocyanin  
17 pathway on plant adaptation to biotic stress using the *B.amyloliquefaciens* QV15 to  
18 trigger blackberry metabolism and identify target genes to improve plant fitness and  
19 fruit quality. To achieve this goal, field-grown blackberries were root-inoculated with  
20 QV15 along its growth cycle. At fruiting, a transcriptomic analysis by RNA-Seq was  
21 performed on leaves and fruits of treated and non-treated field-grown blackberries after  
22 a sustained mildew outbreak; expression of the regulating and core genes of the  
23 Flavonol-Anthocyanin pathway were analysed by qPCR and metabolomic profiles by  
24 UHPLC/ESI-qTOF-MS; plant protection was found to be up to 88%. Overexpression of  
25 step-controlling genes in leaves and fruits, associated to lower concentration of  
26 flavonols and anthocyanins in QV15-treated plants, together with a higher protection  
27 suggest a phytoanticipin role for flavonols in blackberry; kempferol-3-rutinoside  
28 concentration was strikingly high. Overexpression of *RuF3H* (Flavonol-3-hydroxylase)  
29 suggests a pivotal role in the coordination of committing steps in this pathway,  
30 controlling carbon flux towards the different sinks. Furthermore, this C demand is  
31 supported by an activation of the photosynthetic machinery, and boosted by a  
32 coordinated control of ROS into a sub-lethal range, and associated to enhanced  
33 protection to biotic stress.

34



## 35 **Introduction**

36 *Rubus* cv. Loch Ness is a plant that belongs to a large group of plants with  
37 beneficial properties for human health known as berries. This group is characterized for  
38 the high amount of secondary metabolites (flavonoids among others) present in their  
39 fruits, and in leaves [1, 2, 3]; benefits for human health rely on flavonoids to a great  
40 extent [4-5].

41 Plants have successfully colonized all environments of our planet, thanks to their  
42 ability to develop a plant-specialized metabolism as a part of their evolutionary process,  
43 which enables them to adapt to the continuous changing conditions along their lifetime  
44 [6]. Plant secondary metabolism confers plasticity to plants so that they are able to  
45 adapt to changing environmental conditions, usually adverse conditions, ensuring plant  
46 survival [7-8]. Hence, this metabolism is sensitive to different factors among which are  
47 biotic agents, like beneficial or harmful microorganisms, which can be used to trigger  
48 plant metabolism. Therefore, beneficial microorganisms constitute a biotechnological  
49 tool to improve plant fitness and enhance secondary metabolites contents in plant  
50 organs [9,10,11]. More precisely, the use of beneficial bacteria to trigger secondary  
51 metabolism involved in plant defense is gaining a lot of interest and there is increasing  
52 evidence of their effectiveness under controlled and field conditions to support their  
53 effects [12]. Furthermore, elicitation can be used as a tool to identify target genes to be  
54 edited by CRISPR/Cas9 with the aim to improve plant fitness and/or food quality [13].

55 Plant Growth Promoting Bacteria (PGPB) are beneficial strains naturally present  
56 in the rhizosphere of plants contributing to plant health. As it has been demonstrated  
57 certain strains trigger expression of some plant genes, defense related genes among  
58 others, enhancing plant defense metabolism; so when the pathogen tries to invade the

59 plant, it is already prepared and not dramatically infected [14, 15]. Therefore, PGPB  
60 appear as an alternative to chemical pesticides as well as tools to study plant  
61 metabolism. As pests in the agricultural systems are an important threat because they  
62 reduce plant yield and fruit quality, with the consequent economic losses, pest control is  
63 an unquestionable challenge for agriculture and to achieve food security, a term which  
64 refers to “food availability, in sufficient quantities with proper amount of nutrients and  
65 on a consistent basis”. Hence, finding effective biological agents is a challenge, and  
66 unraveling plant changes upon delivery of the biological will set the bases for a  
67 successful agronomic management.

68         The present study focuses on flavonoid metabolism, as it is highly expressed in  
69 blackberry, and both leaves and fruits contain high flavonoid concentrations [16].  
70 Flavonoids belong to a metabolic network that mediates on plant adaptation to  
71 environmental stress. Flavonoids are a ubiquitous group of secondary metabolites key  
72 for adaptation and survival on earth life [17], participating in many different processes  
73 of plant physiology [4, 18, 19, 20, 21, 22, 23, 6, 23]. Hence, a deeper knowledge of  
74 flavonoid metabolism and key enzymes controlling relevant branching points will allow  
75 us to manipulate plant metabolism in our benefit, for example in agriculture. Upon  
76 biotic stress challenge, they may play a different role in defense, as they can either be  
77 defensive molecules by themselves, behaving as phytoalexins, or they may be  
78 accumulated as phytoanticipins and transformed into the real phytoalexins upon  
79 pathogen challenge [24-25].

80         Based on this background, and using *B.amyloliquefaciens* QV15 as a tool to  
81 trigger plant metabolism, the present study reports the systemic effects of root  
82 inoculated bacteria on blackberry leaves and fruits at the transcriptomic and  
83 metabolomic level, focusing on the flavonol-anthocyanin biosynthetic pathway (Fig 1).

84 The aim of this study was (i) to study the effects of elicitation with a beneficial biotic  
85 agent on blackberry leaf and fruit metabolism, (ii) to determine the involvement of the  
86 flavonol-anthocyanin pathway on plant adaptation to biotic stress. To achieve these  
87 objectives, a transcriptomic analysis by RNA-Seq was performed, and qPCR expression  
88 of the regulating and core genes of the Flavonol-Anthocyanin pathway and  
89 metabolomic changes by UHPLC/ESI-qTOF-MS analysis on inoculated and non-  
90 inoculated field-grown blackberries at fruiting, after a sustained mildew outbreak were  
91 determined.

92 **Fig 1. Biosynthesis of anthocyanins, flavonols and catechins via the flavonoid**  
93 **pathway in *Rubus cv. Loch Ness*.** Phenylalanine ammonio-lyase (RuPAL1 and  
94 RuPAL2), Cinammate-4-hydroxylase (RuC4H), 4-coumaryl-CoA ligase (Ru4CL),  
95 Chalcone synthase (RuCHS), Chalcone Isomerase1 (RuCHI1), Chalcone Isomerase2  
96 (RuCHI2), Flavonol-3-hydroxylase (RuF3H), Flavonoid 3'5'hydroxylase (RuF3'5'H),  
97 Flavonoid 3'hydroxylase (RuF3'H), Flavonol synthase (RuFLS), Leucoanthocyanidin  
98 reductase (RuLAR), Anthocyanidin reductase (RuANR), Dehydroflavonol reductase  
99 (RuDFR), Anthocyanidin synthase (RuANS), Flavonol and Anthocyanidin  
100 Glycosyltransferases (RuFLS and RuAGT).

## 101 **Materials and methods**

### 102 **Bacterial strain**

103 *Bacillus amyloliquefaciens* QV15 (CECT 9371) is a gram positive sporulated  
104 bacilli; it was isolated from the rhizosphere of *Pinus pinea* [26]. It produces  
105 siderophores and stimulates pine growth [27], enhances defence against *Pseudomonas*  
106 *syringae* (DC3000) and protects against abiotic stress (NaCl 60 mM) [28].

107 Bacterial strain was maintained at -80 °C in nutrient broth with 20% glycerol.  
108 Inoculum was prepared by streaking strains from -80 °C onto plate count agar (PCA)  
109 plates, incubating plates at 28 °C for 24 h. After that, QV15 was transferred to Luria  
110 Broth liquid media (LB) that was grown under shaking (1000 rpm) at 28 °C for 24 hours  
111 to obtain a  $2 \times 10^9$  cfu/mL inoculum.

## 112 **Plant Materials and experimental set up**

113 *Rubus* cv. Loch Ness is a high yielding tetraploid ( $4n = 28$ ) blackberry, and one  
114 of the most widely cultivated varieties. In southwest Spain, blackberries are produced  
115 under “winter cycle” involving an artificial cold period in order to induce flowering  
116 upon transplant to greenhouses. Blackberry cycle has three stages: vegetative, flowering  
117 and flowering-fruiting; the duration of these stages is variable depending on the  
118 transplant moment, and each stage approximately accounts for one third of the plant’s  
119 life.

120 The *Rubus* cv. Loch Ness plants used in this study were kindly provided by  
121 Agricola El Bosque S.L. (Lucena del Puerto, Huelva, Spain). Plants and greenhouses  
122 were handled according to regular agricultural practices [29]. Plants were grown in  
123 Huelva (South Western Spain) from September 2014 to February 2015 under “winter  
124 cycle”. A total of 360 plants were in the trial, arranged in six greenhouses; each  
125 greenhouse had two lines with 60 plants each, being each line one replicate with 60  
126 repetitions; 3 lines were inoculated and 3 lines were left as non-inoculated controls.  
127 QV15 was root inoculated every 15 days during the whole plant cycle with 0.5 L of  
128 inoculum at  $10^7$  cfu/ml per plant.

129 In this experiment, plants were transplanted at the end of September 2014,  
130 flowering took place in November and maximum fruiting in January 2015. Number of  
131 flowers per square meter at flowering, and accumulated fruit production, were recorded.  
132 A natural Mildew outbreak took place from November till harvest, and disease  
133 incidence was recorded by visual evaluation of the surface affected carried out by 3  
134 independent expert observers. At fruiting, leaves were sampled and immediately frozen  
135 in liquid nitrogen, and then brought to the lab. Three replicates were taken, being each  
136 one constituted from plant material of 60 plants; leaves were randomly sampled and  
137 pooled constituting one replicate and red fruits were taken at the same moment Samples  
138 were powdered with liquid nitrogen for RNA extraction for qPCR and further analysis:  
139 pigments (chlorophylls) and bioactives (phenols, flavonols, anthocyanins)  
140 determination by colorimetry and UHPLC/ESI-qTOF-MS

## 141 **RNA extraction**

142 Total RNA was isolated from each replicate with Plant/Fungi Total RNA  
143 Purification kit [30] (NORGENTM) (DNase treatment included) and, a reverse  
144 transcription followed by a RT-qPCR and RNA-Seq were performed.

## 145 **RNA-Seq**

## 146 **Quality control and Library preparation**

147 RNA was obtained from the three biological replicates for RNA-Seq analysis.  
148 RNA samples were DNase treated and extracted as described before. Thirty µl of RNA  
149 samples were passed through quality control with Nanodrop™ and Experion™, after

150 that total RNA meeting quality criteria was sent to Exiqon™ for sequencing. A total of  
151 three libraries were done for each organ

152 During the library preparation, poly-A tailed transcripts were enriched, as  
153 mRNA sequencing targets this type of transcripts, using an Oligo-dT magnetic bead-  
154 based system were enriched. The poly-A tailed transcripts include the coding mRNAs  
155 (1-4% of the whole transcriptome), so by this enrichment the appropriate depth of the  
156 sequencing for coding mRNA was achieved. The library preparation also retains  
157 information of which of the two strands of DNA was used to transcribe the given RNA,  
158 which enables the detection of antisense transcript expression. Mitochondrial poly-A  
159 tailed transcripts were bioinformatically filtered since they were considered to be high  
160 abundance sequences. The sequencing was paired end, which increases the mapping  
161 percentage to poorly annotated genomes, and identifies splice variants.

162 Two types of sequencing library quality controls were performed, firstly after  
163 the library preparation and bead based size selection, the size distribution of the library  
164 was evaluated using a Bioanalyzer high sensitivity DNA chip. Then, qPCR based  
165 quantification of each library was performed, and samples were normalized and pooled  
166 in equimolar ratios. After pooling of sample libraries, qPCR based quantification was  
167 performed on the library pool to ensure optimal concentration for cluster generation on  
168 the flow cell.

## 169 **Sequencing**

170 The library pools to be sequenced were denatured and diluted/neutralized in the  
171 required concentrations. Then, cluster generation was performed on the appropriate  
172 flow cell using single molecule clonal amplification. Finally, the high- throughput next

173 generation sequencing was performed using the Illumina sequencing technology  
174 platform.

## 175 **RNA library assembly**

176 Ribosomal RNA removal was performed with the Ribo-Zero rRNA kit removal  
177 kit. Generation of libraries was performed with the TruSeq Stranded Total RNA library  
178 Prep kit following manufacturer's recommendations. We started from 2 µg of total  
179 RNA (RIN>9) libraries, which were sequenced using a HiSeq2500 instrument (Illumina  
180 Inc, San Diego, CA, USA). Sequencing readings were paired end with a length of  
181 101bp reading performed in 6 samples. The estimated coverage was around 52 million  
182 reads per sample (1 lane). Library generation and RNA sequencing was done at  
183 Sistemas Genómicos S.L. (Valencia, Spain) following manufacturer's instructions.

## 184 **RNA transcriptomic analysis**

185 The quality control of the raw data was performed using the FastQC v0.11.4  
186 tool. Then, the raw paired-end reads were mapped against the *Rubus occidentalis*  
187 genome v1.1 provided by GDR database using Tophat2 2.1.0 algorithm [31].  
188 Insufficient quality reads (phred score<5) were eliminated using Samtools 1.2 [32] and  
189 Picard Tools 2.12.1. In this step, we assessed the GC distribution (i.e. the proportion of  
190 guanine and cytosine bp along the reads), which should have a desired distribution  
191 between 40–60%. Second, distributions of duplicates (quality of sequencing indicator)  
192 were evaluated to confirm that our sequencing contained small proportion of duplicates.  
193 Expression levels were calculated using the HiTSeq [33]. This method employs unique  
194 reads for the estimation of gene expression and filters the multimapped reads.  
195 Differential expression analysis between conditions was assessed using DESeq2 [34].

196 Finally, we selected differentially expressed genes with a P value adjusted by FDR [35]  
197 0.05 and a fold change of at least 1.2. The DEG analysis between groups was done  
198 using statistical packages designed by Python and R. Using DESeq2 algorithm [34]  
199 applying a differential negative binomial distribution for the statistics significance [31-  
200 34] we identified genes differentially expressed. We considered as differently expressed  
201 genes those with a FC value below  $-1.2$  or higher than  $1.2$  and with P value (P<sub>adj</sub>)  
202 corrected by  $FDR \leq 0,05$  to avoid identification of false positives across the differential  
203 expression data.

## 204 **Photosynthetic pigments (chlorophylls and carotenoids)**

### 205 **extraction and quantification in leaves**

206 Chlorophylls were isolated from each replicate. One hundred mg of powdered  
207 leaves were dissolved in 3 mL of acetone 80%, vortexed and centrifuged for 5 min at  
208 10000 r.p.m (Hermle Z233 M-2). Absorbance was measured at 645, 662 and 470 nm in  
209 a Biomate 5 spectrophotometer. To calculate chlorophyll a, chlorophyll b, and  
210 carotenoids, the following formulas were used [36].

- 211 ○  $Chl\ a\ (mg\ g^{-1}) = [(12.25 \times Abs_{663}) - (2.79 \times Abs_{647})] \times V\ (ml) / weigh\ (mg).$
- 212 ○  $Chl\ b\ (mg\ g^{-1}) = [(21.5 \times Abs_{647}) - (5.1 \times Abs_{663})] \times V\ (ml) / weigh\ (mg).$
- 213 ○  $Carotenoids\ (mg\ g^{-1}) = ((1000 \times Abs_{470}) - (1.82 \times Chl\ a) - (85.02 \times Chl\ b)) / 198)$   
214  $\times V\ (ml) / weigh\ (mg).$

## 215 **Bioactive characterization**

### 216 **Colorimetric quantification**



217 Two extracts were prepared. One g of powdered leaves from each replicate was  
218 mixed with 9 mL of methanol 80% for phenols and flavonols determination, and one  
219 gram with 9 mL of methanol 80% 0.1% HCl for anthocyanins determination; then,  
220 samples were sonicated for 10 min and centrifuged for 5 min at 5000 rpm. Supernatants  
221 were frozen and lyophilized. The same was done with fruit samples

222 Total phenols were quantitatively determined with Folin-Ciocalteu reagent  
223 (Sigma. Aldrich, St Louis, MO) by a colorimetric method described in [37], with some  
224 modifications; gallic acid was used as standard (Sigma-Aldrich, St Louis, MO). One  
225 milliliter of extract was mixed with 0.250 mL of Folin-Ciocalteu 2N (Sigma. Aldrich, St  
226 Louis, MO) and 0.75 mL of Na<sub>2</sub>CO<sub>3</sub> 20% solution. After 30 minutes at room  
227 temperature, absorbance was measured at 760 nm with an UV-Visible  
228 spectrophotometer (Biomate 5). A gallic acid calibration curve was made (r= 0.99).  
229 Results are expressed in mg of gallic acid equivalents per g of powdered leaves. The  
230 same was done with fruit samples. All samples were measured in triplicate.

231 Total flavonols were quantitatively determined through the test described in  
232 [38], using catechin as standard (Sigma-Aldrich, St Louis, MO). One milliliter of  
233 extract was added to a 10 mL flask with 4 mL of distilled water. After that, 0.3 mL of  
234 NaNO<sub>2</sub> 5%, and 0.3 mL of AlCl<sub>3</sub> 10% were added after 5 minutes. One minute later, 2  
235 mL of NaOH 1 M were added and the mixture was brought to 10 mL with distilled  
236 water. The solution was mixed and measured at 510 nm with an UV-Visible  
237 spectrophotometer (Biomate 5). A catechin calibration curve was made (r= 0.99).  
238 Results are expressed as mg of catechin equivalents per g of powdered leaves. The same  
239 was done with fruits. All samples were measured in triplicate.

240 Total anthocyanins were quantitatively determined through the pH differential  
241 method described by [39]. Extracts were diluted in pH 1 buffer (0.2 M KCl) and pH 4.5  
242 (1M CH<sub>3</sub>COONa) in 1:15 proportion. After that, absorbance was measured at 520 and  
243 720 nm respectively, in a UV-Visible spectrophotometer (Biomate 5). A cyanidin-3-  
244 glucoside calibration curve was made (r= 0.99). Results are expressed in cyanidin-3-  
245 glucoside equivalents per g of powdered leaves. The same was done with fruits. All  
246 samples were measured in triplicate.

### 247 **UHPLC/ESI-qTOF-MS Phenolics and Flavonoids Analysis**

248 Standards and solvents: Phenolic acids including, gallic acid, caffeic acid, ferulic  
249 acid and chlorogenic acid were purchased from Sigma (St. Louis, MO, USA) and  
250 flavonoids including, kaempferol, kempherol-3-*O*-rutinoside, kempherol-3-*O*-glucoside,  
251 quercetin, quercetin-3-*O*-rutinoside, quercetin-3-*O*-glucoside, (+)-catechin, (-)-  
252 epicatechin and cyanidin-3-*O*-glucoside, were purchased from Sigma and from  
253 Extrasynthese Co. <sup>TM</sup> (Geney, France).

254 The standard solutions (10 ppm) were prepared in methanol. All the solvents, as  
255 methanol and acetonitrile (*Honeywell Riedel-de Haen*), were LC-MS grade. Purified  
256 water was obtained from Milli-Q Plus<sup>TM</sup> System from Millipore (Milford, MA, USA).  
257 Formic acid was purchased from Aldrich (St. Louis, MO, USA)

### 258 **Sample preparation**

259 The extraction of phenolics was performed as follows: 30 mg of powder were  
260 added to 300 μL of methanol. The mixture was vortexed for 2 min, sonicated for 5 min  
261 and centrifuged at 3.500 rpm for 5 min at 4 °C. The supernatants were then collected  
262 and stored at -20 °C until use for LC/MS analysis.

## 263 UHPLC/ESI-qTOF-MS Analysis

264 Samples were analyzed on a 1290 Infinity series UHPLC system coupled  
265 through an electrospray ionization source (ESI) with Jet Stream technology to a 6550  
266 iFunnel QTOF/MS system (Agilent Technologies, Waldbronn, Germany) as described  
267 in [40].

268 For the separation, a volume of 2  $\mu$ L was injected in a reversed-phase column  
269 (Zorbax Eclipse XDB-C18 4.6  $\times$  50 mm, 1.8  $\mu$ m, Agilent Technologies) at 40  $^{\circ}$ C. The  
270 flow rate was 0.5 mL/min with a mobile phase consisted of solvent A: 0.1% FA, and  
271 solvent B: methanol. Gradient elution consisted of 2% B (0-6 min), 2-50% B (6-10  
272 min), 50-95% B (11-18 min), 95% B for 2 min (18-20 min), and returned to starting  
273 conditions 2% B in one minute (20-21 min) to finally keep the re-equilibration with a  
274 total analysis time of 25 min.

275 Detector was operated in full scan mode ( $m/z$  50 to 2000), at a scan rate of 1  
276 scan/s. Accurate mass measurement was assured through an automated calibrator  
277 delivery system that continuously introduced a reference solution, containing masses of  
278  $m/z$  121.0509 (purine) and  $m/z$  922.0098 (HP-921) in positive ESI mode; whereas  $m/z$   
279 112.9856 (TFA) and  $m/z$  922.009798 (HP-921) in negative ESI mode. The capillary  
280 voltage was  $\pm$ 4000 V for positive and negative ionization mode. The source temperature  
281 was 225  $^{\circ}$ C. The nebulizer and gas flow rate were 35 psig and 11 L/min respectively,  
282 fragmentor voltage to 75V and a radiofrequency voltage in the octopole (OCT RF Vpp)  
283 of 750 V.

284 For the study, MassHunter Workstation Software LC/MS Data Acquisition  
285 version B.07.00 (Agilent Technologies) was used for control and acquisition of all data  
286 obtained with UHPLC/ESI-qTOF-MS.

287 For quantification, each standard was injected twice in four different  
288 concentrations to build up calibration curves in which sample peak areas were  
289 interpolated.

## 290 **Data treatment**

291 UHPLC-MS data processing was performed by MassHunter Qualitative  
292 Analysis (Agilent Technologies) Software version B.08.00 using Molecular Feature  
293 Extraction (MFE).

## 294 **RT-qPCR Analysis**

295 The retrotranscription was performed using iScript™ cDNA Synthesis Kit (Bio-  
296 Rad). All retrotranscriptions were performed using a GeneAmp PCR System 2700  
297 (Applied Biosystems): 5 min 25 °C, 30 min 42 °C, 5 min 85 °C, and hold at 4 °C. The  
298 amplification were performed with a MiniOpticon Real Time PCR System (Bio-Rad): 3  
299 min at 95 °C and then 39 cycles consisting of 15 s at 95 °C, 30 s at 55 °C and 30 s at 72  
300 °C, followed by melting curve to check the results. To describe the expression obtained  
301 in the analysis, cycle threshold (Ct) was used. Standard curves were calculated for each  
302 gene, and the efficiency values ranged between 90 and 110%. *HISTONE H3 (HIS)*  
303 reference gene was used. Results for gene expression were expressed as differential  
304 expression by the  $2^{-\Delta\Delta C_t}$  method (62). Control expression is set at 1, therefore only  
305 increases above one are considered. Core and regulatory genes studied and the primers  
306 used for each appear in Table 3 of supplementary material.

## 307 **Statistical analysis**

308 To evaluate treatment effects on photosynthetic pigments, bioactive contents and  
 309 gene expression, one-way ANOVA analysis were performed. When significant  
 310 differences appeared ( $p < 0.05$ ), LSD test (Least significant Difference) from Fisher was  
 311 used. Statgraphics plus 5.1 for Windows was the program used.

## 312 **Results**

### 313 **Evaluation of plant fitness**

314 There is a significant increase of flowers per square meter in QV15-inoculated  
 315 plants not associated to an increase in production. The Mildew outbreak started in  
 316 November and was maintained throughout the plant cycle; controls showed 15%  
 317 affected surface on average, while QV15 treated plants showed an average 5%. The  
 318 relative disease index determined at fruiting indicates a rough 88% protection against  
 319 the natural fungal disease (table 1).

320 **Table 1. Plant fitness parametres in controls and QV15 treated plants.**

|                | <b>Flowers/m<sup>2</sup></b> | <b>Production<br/>(Kg)</b> | <b>Evolution of<br/>disease<br/>(%affected<br/>surface)</b> | <b>Relative<br/>disease index<br/>(%)</b> |
|----------------|------------------------------|----------------------------|-------------------------------------------------------------|-------------------------------------------|
| <b>Control</b> | 237.95 ± 2.28 (a)            | 6.2 ± 0.22 (a)             | 15% (b)                                                     | 100 ± 1.05 (b)                            |
| <b>QV15</b>    | 323.5 ± 1.77 (b)             | 6.4 ± 0.09 (a)             | 5% (a)                                                      | 12.02 ± 0.36 (a)                          |

321 Number of flowers per square meter of blackberry plants at flowering. Production  
 322 (Kilograms per plant). Disease incidence measured as affected leaf surface (%) with  
 323 Mildew symptoms in blackberry plants from November (21<sup>st</sup> November) to harvest in  
 324 february (02/05/2018). Relative disease index expressed as accumulated values of

325 affected leaf surface (%) with Mildew symptoms relative to controls. Different letters  
326 denote statistically significant differences according to LSD test ( $p < 0.05$ ).

## 327 **RNA-Seq**

328 In a typical experiment of whole transcriptome analysis, the number of mapped  
329 lectures to the reference genome is around 50%. In this case, in which the reference  
330 genome is *Rubus occidentalis* (v1.0 & Annotation v1 from the database of GDR), the  
331 mapping fraction obtained was around 50% (49.97% to 52.43%) (Table S1,  
332 supplementary material).

333 After sequencing and mapping alignment, normalized and differential  
334 expression (Control vs. QV15), a total of 29,126 genes were identified in leaves. The  
335 heatmap diagram (figure 2) shows the result of the two-way hierarchical clustering of  
336 RNA transcripts and samples; it includes the 50 genes that have the largest coefficient  
337 of variation based on FPKM counts. Each row represents one gene and each column  
338 represents one sample. The color represents the relative expression level of a transcript  
339 across all samples. The color scale is shown below: red represents an expression level  
340 above the mean; green represents an expression level below the mean.

341 **Fig 2. Heat Map and unsupervised hierarchical clustering by sample;** top 50 genes  
342 with the largest coefficient of variation based on FPKM counts, a) in leaves b) in fruits

343 When leaf samples were compared, the expression pattern showed that 28,586  
344 genes were equally expressed in both treatments (expression without significant  
345 differences), 173 genes were significantly overexpressed in leaves of controls, and 367  
346 genes were significantly overexpressed in leaves of QV15-treated plants (figure 3a).

347 When fruits were compared, expression of 27,866 genes showed non-significant

348 differences, while genes overexpressed in controls accounted for 595, and genes  
349 overexpressed in QV15-treated plants accounted for 664 (figure 3b), being these  
350 numbers triple and double than in leaves, respectively.

351 **Fig 3 Venn diagram of overexpressed and common genes in blackberry leaves (a)**  
352 **and fruits (b) from control and QV15-treated plants**

353 Overexpressed genes in leaves appear in file1 (supplementary material). In  
354 controls, most genes are related to the phenylpropanoids-flavonoid pathway, and sugar  
355 metabolism. Overexpressed genes in leaves of QV15-treated plants are related to an  
356 active photosynthesis (mostly related to photosystems I and II), to an active  
357 regeneration of photosystems including pigments biosynthesis, and to an efficient  
358 capacity of ROS scavenging, as shown by the high number of transcripts of superoxide  
359 dismutase (SOD), and ascorbate peroxidase (APX). It is worth mentioning the high  
360 expression of glutathione-S-transferase 2 (GST2) (Table S2. supplementary material).

361 Two groups appear among overexpressed genes in control fruits (file S2,  
362 supplementary material); in one hand, a high vacuolar activity and an active sucrose  
363 metabolism are enhanced, and in the other hand, many transcripts of ubiquitin-protein  
364 ligases, serin/theronin kinases and Fbox/FBD/LRRs. In QV15-treated fruits, specialized  
365 defense enzymes such as subtilisin, different glucanases and chitinases, and a striking  
366 overexpression of GDSL esterase/lipases, a family of proteins that has been related to  
367 secondary metabolites synthesis and plant defense [47].

368 **Photosynthetic pigments (chlorophylls and carotenoids)**

369 Chlorophylls and carotenoids were more abundant in leaves of QV15-treated  
370 plants (table 2). Control plants had 0.57 mg g<sup>-1</sup> Chl a, 0.23 mg g<sup>-1</sup> Chl b, and 0.38 mg g<sup>-1</sup>

371 carotenoids; while QV15 treated plants had 0.72 mg g<sup>-1</sup> Chl a, 0.36 mg g<sup>-1</sup> Chl b, and  
 372 0.42 mg g<sup>-1</sup> carotenoids; this represents a rough 54% increase in chlorophyll contents,  
 373 mainly chlorophyll b, and 5% carotenoid content increase in QV15 treated plants.

374 **Table 2. Leaf pigments in blackberry leaves in controls and QV15 treated plants.**

| Samples        | Chlorophyll A (mg g <sup>-1</sup> ) | Chlorophyll B (mg g <sup>-1</sup> ) | Carotenoids (mg g <sup>-1</sup> ) |
|----------------|-------------------------------------|-------------------------------------|-----------------------------------|
| <b>Control</b> | 0.57 ± 0.007 (a)                    | 0.23 ± 0.006 (a)                    | 0.38 ± 0.004 (a)                  |
| <b>QV15</b>    | 0.72 ± 0.004 (b)                    | 0.36 ± 0.017 (b)                    | 0.42 ± 0.002 (b)                  |

375 Quantification of chlorophyll A, B, and Carotenoids in blackberry leaves. Values are the  
 376 average of 3 replicates ± SD. Different letters denote statistically significant differences  
 377 between treatments for each parameter according to LSD test (p<0.05).

### 378 **Phenolics and Flavonoids Characterization**

379 Leaves of QV15 treated plants had lower values of total phenolics (-18%), total  
 380 flavonoids (-33%) and total anthocyanins (-21%) than controls. Total phenolic contents  
 381 averaged 16.88 mg g<sup>-1</sup> and 13.69 mg g<sup>-1</sup> for control and QV15 treated plants,  
 382 respectively. Total flavonols represent between 11 and 9 % of total phenolics, with  
 383 1.8561 mg g<sup>-1</sup> and 1.2463 mg g<sup>-1</sup> for controls and QV15 treated plants, respectively.  
 384 Total anthocyanins represent around 1.6% of total phenolics, with 0.284 mg g<sup>-1</sup> and  
 385 0.2209 mg g<sup>-1</sup> for controls and QV15 treated plants, respectively (Table 3).

386 **Table 3. Leaf and fruit Bioactives in controls and QV15 treated plants.**

387

388



| <b>Samples</b>        | <b>Phenols<br/>(mg g<sup>-1</sup>)</b> | <b>Flavonols<br/>(mg g<sup>-1</sup>)</b> | <b>Anthocyanins<br/>(mg g<sup>-1</sup>)</b> |
|-----------------------|----------------------------------------|------------------------------------------|---------------------------------------------|
| <b>Control Leaves</b> | 16.88 ± 0.292 (b)                      | 1.85 ± 0.061 (b)                         | 0.28 ± 0.007 (b)                            |
| <b>QV15 Leaves</b>    | 13.69 ± 0.621 (a)                      | 1.24 ± 0.078 (a)                         | 0.22 ± 0.026 (a)                            |
| <b>Control Fruit</b>  | 5.04 ± 0.074 (x)                       | 0.31 ± 0.012 (x)                         | 0.64 ± 0.015 (x)                            |
| <b>QV15 Fruit</b>     | 4.41 ± 0.187 (y)                       | 0.29 ± 0.003 (x)                         | 0.68 ± 0.004 (y)                            |

389 Quantification of total phenolics, flavonols and anthocyanins in blackberry leaves and (b)  
390 fruits. Values are the average of 3 replicates ± SD. Different letters denote statistically  
391 significant differences between control and treated leaves (a,b) or fruits (x,y), according  
392 to LSD test (p<0.05).

393 Fruits showed significantly higher levels in controls (5.6 mg/g) than QV15-  
394 treated plants (4.93mg/g), while total flavonoids and anthocyanins showed non-  
395 significant differences (Table 3).

396 Characterization of the methanolic extract of Blackberry leaves and fruits using  
397 UHPLC/ESI-qTOF-MS provided a good separation profile (Figure 4). The visualization  
398 of both chromatograms profile, run of 25 min, revealed more intense and well-resolved  
399 chromatographic peaks in negative compared to the positive ion mode.

400 **Fig 4. Overlaid Chromatograms (positive and negative ion mode) obtained from**  
401 **LC/MS/TOFF analysis of the methanolic extract of BlackBerry leaf samples.**

402 Control samples are represented in Green while QV15 samples appear in red

403 This method allowed separation of three groups of compounds: phenolic  
404 compounds eluted first, from min 0,5 to min 13; then, ursane-type triterpene saponins,  
405 from 12,5 to 18,5 minutes, and chlorophyll break down products from 18,5 to 22 min  
406 (Fig 4). Chlorophyll breakdown products were higher in controls than in QV15 treated

407 plants. When fruits were analyzed, phenolic compounds eluted first; uranes and  
 408 chlorophyll breakdown products were not present (supplementary material, Figure S1)

409 In Blackberry leaves, characteristic flavonols were kaempferol and quercetin  
 410 derivatives, and (-)-epicatechin among catechols, being gallic acid the most abundant  
 411 phenolic acid. Table 4 shows that the most abundant flavonols identified in leaves were  
 412 quercetin-3-O-rutinoside, kempferol-O-glucoside, quercetin-3-O-glucoside and  
 413 kaempferol-3-O-rutinoside, being quercetin 3-O-glucoside the less abundant and  
 414 kaempferol-3-O-rutinoside the most abundant.

415 **Table 4. Identification and quantification of phenolic compounds in leaf samples of**  
 416 **controls and QV15 treated plants.**

417

| Peak No. | Compounds                | $t_R$ (min) | Molecular Formula                               | Monoisotopic Mass | $m/z$ experimental <sup>b</sup> | Area average (control) | $\mu\text{g/g}$ | Area average (QV15) | $\mu\text{g/g}$ |
|----------|--------------------------|-------------|-------------------------------------------------|-------------------|---------------------------------|------------------------|-----------------|---------------------|-----------------|
| 1        | gallic acid              | 3.0         | C <sub>7</sub> H <sub>6</sub> O <sub>5</sub>    | 170.0215          | [M-H] <sup>-</sup> = 169.0149   | 3.70E+05               | 9.143           | 3.52E+05            | 8.237           |
| 2        | gentisic acid            | 8.3         | C <sub>7</sub> H <sub>6</sub> O <sub>4</sub>    | 154.0266          | [M-H] <sup>-</sup> = 153.0196   | 1.14E+05               | 3.570           | 8.73E+04            | 2.740           |
| 3        | 6,7-dihydroxycoumarin    | 9.2         | C <sub>9</sub> H <sub>6</sub> O <sub>4</sub>    | 178.0266          | [M-H] <sup>-</sup> = 177.0181   | 8.51E+04               | <LoQ            | 1.38E+05            | <LoQ            |
| 4        | (-)-epicatechin          | 9.4         | C <sub>15</sub> H <sub>14</sub> O <sub>6</sub>  | 290.0790          | [M-H] <sup>-</sup> = 289.0723   | 3.63E+06               | 6.793           | 7.18E+05*           | 3.124           |
| 5        | quercetin-3-O-glucoside  | 11.0        | C <sub>21</sub> H <sub>20</sub> O <sub>12</sub> | 464.0955          | [M-H] <sup>-</sup> = 463.0887   | 6.41E+06               | 7.045           | 6.49E+06            | 7.324           |
| 6        | quercetin-3-O-rutinoside | 11.1        | C <sub>27</sub> H <sub>30</sub> O <sub>16</sub> | 610.1534          | [M-H] <sup>-</sup> = 609.1494   | 1.08E+07               | 28.201          | 7.96E+06            | 17.827          |
| 7        | kaempferol-3-O-glucoside | 11.5        | C <sub>21</sub> H <sub>20</sub> O <sub>11</sub> | 448.1006          | [M-H] <sup>-</sup> = 447.0938   | 4.23E+06               | 9.806           | 3.81E+06            | 8.148           |

|   |                           |      |                                                |          |                               |          |        |          |            |
|---|---------------------------|------|------------------------------------------------|----------|-------------------------------|----------|--------|----------|------------|
| 8 | kaempferol-3-O-rutinoside | 11.5 | C <sub>7</sub> H <sub>6</sub> O <sub>3</sub>   | 138.0317 | [M-H] <sup>-</sup> = 593.1520 | 4.11E+06 | 37.056 | 5.70E+06 | 58.11<br>9 |
| 9 | luteolin                  | 12.7 | C <sub>15</sub> H <sub>10</sub> O <sub>6</sub> | 286.0477 | [M-H] <sup>-</sup> = 285.0395 | 8,27E+05 | <LoQ   | 1,04E+06 | <LoQ       |

418

419 Identification and quantification of predominant compounds, expressed in µg/g, of  
420 phenolic compounds in leaf samples. Data is the average of 3 samples, with two  
421 injections each. <LoQ: below limit of quantitation (LoQ)

422 All of them except for kaempferol-O-rutinoside were higher in controls than in  
423 QV15-treated blackberries, as well as phenolic acids; interestingly, kempferol-O-  
424 rutinoside concentration was over 50% higher, and a marked decrease (54%) in (-)-  
425 epicatechin was observed (table 4).

426 In Blackberry fruits, characteristic flavonols were epicatechin, catechin, and  
427 flavonols were represented by kaempferol and quercetin derivatives; vanillic acid was  
428 also present in relevant amounts (Table 5). Epicatechin was by far, the most abundant  
429 compounds in red fruits, 200 µg/g on average, while flavonols and anthocyanins were  
430 on the 5-10 µg/g range. The most abundant flavonols were quercetin 3-O-glucoside,  
431 quercetin-3-O-rutinoside, kaempferol-3-O-rutinoside, and kempferol-O-glucoside while  
432 the most relevant anthocyanins were cyanidin 3-O-glucoside and cyanidin 3-O-  
433 arabinoside; delphinidin was detected only in QV15 treated plants. All of them are  
434 described from higher to lower abundance. Controls showed higher concentrations of all  
435 compounds except for kempferol derivatives and quercetin-O-galactoside, as occurred in  
436 leaves.

437 **Table 5. Identification and quantification of phenolic compounds in fruit samples**  
438 **of controls and QV15 treated plants.**

| N° | NAME COMPOUND             | MW (g/mol) | RT (Q-TOF) | Chemical Formula                                | Monoisotopic Mass | Area average (control) | µg/g     | Area average (QV15) | µg/g     |
|----|---------------------------|------------|------------|-------------------------------------------------|-------------------|------------------------|----------|---------------------|----------|
| 1  | Salicylic acid            | 138,12     | 11,5       | C <sub>7</sub> H <sub>6</sub> O <sub>3</sub>    | 138,0317          | 1,00e+05               | <LOQ     | 1,40e+05            | <LOQ     |
| 2  | Vanillic acid             | 168,15     | 9,2        | C <sub>8</sub> H <sub>8</sub> O <sub>4</sub>    | 168,1467          | 6,14E+04               | 11       | 6,96e+04            | 14       |
| 3  | Chlorogenic acid          | 354,31     | 8,9        | C <sub>16</sub> H <sub>18</sub> O <sub>9</sub>  | 354,0951          | 6,71E+05               | <LoQ     | 5,95e+05            | <LoQ     |
| 4  | Phlorizin                 | 436,41     | 11,3       | C <sub>21</sub> H <sub>24</sub> O <sub>10</sub> | 436,1369          | 1,11E+05               | <LoQ     | 4,98e+04            | <LoQ     |
| 5  | (-)-epicatechin           | 290,27     | 9,4        | C <sub>15</sub> H <sub>14</sub> O <sub>6</sub>  | 290,0790          | 6,24E+07               | 231,197  | 5,79e+07            | 214,749  |
| 6  | (+)-catechin              | 290,27     | 8,5        | C <sub>15</sub> H <sub>14</sub> O <sub>6</sub>  | 290,0790          | 1,49E+06               | 4,914    | 1,26e+06            | 4,142    |
| 7  | Kaempferol-3-O-glucoside  | 448,38     | 11,5       | C <sub>21</sub> H <sub>20</sub> O <sub>11</sub> | 448,1006          | 3,52E+05               | 0,761    | 4,00e+05            | 0,864    |
| 8  | Kaempferol-3-O-rutinoside | 594,52     | 11,5       | C <sub>27</sub> H <sub>30</sub> O <sub>15</sub> | 594,1585          | 3,66E+05               | 1,825    | 4,84e+05            | 2,415    |
| 9  | Quercetin                 | 302,24     | 12,4       | C <sub>15</sub> H <sub>10</sub> O <sub>7</sub>  | 302,0459          | 6,35E+04               | <LoQ     | 5,64e+04            | <LoQ     |
| 10 | Quercetin-3-O-glucoside   | 464,38     | 11,1       | C <sub>21</sub> H <sub>20</sub> O <sub>12</sub> | 464,0955          | 2,35E+06               | 5,016    | 2,32e+06            | 3,244    |
| 11 | Quercetin-3-O-rutinoside  | 610,52     | 11,0       | C <sub>27</sub> H <sub>30</sub> O <sub>16</sub> | 610,1534          | 1,53E+06               | 3,104    | 1,52E+06            | 2,871    |
| 12 | Quercetin-3-O-galactoside | 464,3763   | 9,4        | C <sub>21</sub> H <sub>20</sub> O <sub>12</sub> | 464,0955          | 6,22E+05               | a        | 7,08E+05            | a        |
| 13 | Malvidin-3-O-galactoside  | 493,39     | 9,6        | C <sub>23</sub> H <sub>25</sub> O <sub>12</sub> | 493,1346          |                        | <LoQ     |                     | <LoQ     |
| 14 | Delphinidin               | 303,2436   | 9,1        | C <sub>15</sub> H <sub>11</sub> O <sub>7</sub>  | 303,0505          | 1,18E+06               | a        | 1,35E+06            | a        |
| 15 | Cyanidin-3-O-arabinoside  | 419,3589   | 9,4        | C <sub>20</sub> H <sub>19</sub> O <sub>10</sub> | 419,0978          | 3,52E+05               | a        | 2,64E+05            | a        |
| 16 | Cyanidin-3-O-glucoside    | 448,3769   | 9,2        | C <sub>21</sub> H <sub>20</sub> O <sub>11</sub> | 448,1006          | 4,32E+07               | 2959,344 | 3,90E+07            | 2672,706 |

440

441 Identification and quantification on phenolic compounds present in blackberry fruits of  
442 control and QV15 treated samples. Data is the average of 3 biological replicates, 2  
443 injections each. a) no standard available for quantification. <LoQ: below limit of  
444 quantitation (LoQ)

445 In addition to those compounds, an exhaustive analysis of other peaks was  
446 carried out by comparing the full TOF mass spectral data features to a list of possible  
447 compounds showing that mass. Some interesting compounds with bioactive potential  
448 were identified such as procyanidins, or galactosyl-diacyl-glycerid derivatives and the

449 ellagic tannin sanguin H6, which could be identified only in the negative mode.  
450 Interestingly, all were higher in controls except for a galactosyldiacy-glycerid, which  
451 appeared only in QV15 treated fruits, in the positive mode, showing a large area in the  
452 chromatogram (supplementary material figure 1s).

## 453 **RT-qPCR Analysis of core and regulatory genes of the** 454 **Flavonol-Anthocyanin Pathway**

455 Figures 5 and 6 show differential expression of the regulatory and core genes of  
456 the flavonol-anthocyanin pathway in leaves and fruits, respectively. Control expression  
457 is marked as 1, therefore, expression values over one indicate overexpression in QV15  
458 treated plants; conversely, values below one can be interpreted as overexpression in  
459 controls. Asterisks indicate statistically significant differences.

460 In leaves of QV15-inoculated plants, the transcription factors *RuMYB3* and  
461 *RuMYB5* were significantly overexpressed (insert Fig), while *RuMYB1* and *RuMYB4*  
462 were overexpressed in controls. In general, expression of the flavonol-anthocyanin  
463 pathway core genes was higher in controls (Fig 5). Two isoforms were studied for  
464 *RuPAL*, *RuCHI*, and *RuGST*. Both *RuPAL* isoforms were overexpressed in control  
465 plants, being overexpression of *RuPAL1* significantly higher in controls than in QV15  
466 treated plants. *RuCHI1*, *RuFLS*, *RuLAR*, *RuANR*, *RuDFR* and *RuANS* were  
467 overexpressed in control plants. Last enzyme of phenylpropanoids, *Ru4CL*, and last of  
468 early flavonol biosynthetic genes, *RuF3H*, were significantly overexpressed in QV15  
469 treated plants. Genes encoding for the other enzymes *RuC4H*, *RuCHS*, *RuCHI2*,  
470 *RuF3'5'H* and *RuF3'H* were similarly expressed in control and QV15 treated plants. It  
471 was also found that *RuGST1* (glutathione S transferase 1) was overexpressed in control

472 plants, while *RuGST2* (glutathione S transferase 2) was overexpressed in QV15 treated  
473 plants (supplementary material. table S2).

474 **Fig 5. Flavonol-Anthocyanin Pathway gene expression analyzed by RT-qPCR in**  
475 **leaves.** The line set at value of 1 represents gene expression in controls, so values over  
476 one indicate overexpression in QV15 treated plants and values below one indicate  
477 overexpression in controls. Phenylalanine ammonio-lyase (*RuPAL1* and *RuPAL2*),  
478 Cinammate 4 hydroxylase (*RuC4H*), 4-coumaryl-CoA ligase (*Ru4CL*), Chalcone  
479 synthase (*RuCHS*), Chalcone Isomerase1 (*RuCH11*), Chalcone Isomerase2 (*RuCH12*),  
480 Flavonol-3-hydroxylase (*RuF3H*), Flavonoid 3'5'hydroxylase (*RuF3'5'H*), Flavonoid  
481 3'hydroxylase (*RuF3'H*), Flavonol synthase (*RuFLS*), Leucoanthocyanidin reductase  
482 (*RuLAR*), Anthocyanidin reductase (*RuANR*), Dehydroflavonol reductase (*RuDFR*),  
483 Anthocyanidin synthase (*RuANS*). Insert: Flavonol-anthocyanin pathway regulatory  
484 genes. Asterisks indicate significant differences, according to Fisher test ( $p < 0.05$ ).

485 In fruits, expression of the flavonol-anthocyanin pathway core genes was higher  
486 in controls (Fig 6). Two isoforms were studied for *RuPAL*, *RuCHI*, and *RuGST*. Both  
487 *RuPAL* isoforms were overexpressed in control plants, being overexpression of *RuPAL2*  
488 significantly higher in controls than in QV15 treated plants. *Ru4CL*, *RuCH11*, *RuCH12*  
489 (early genes of flavonol-anthocyanin pathway), *RuF3'5'H*, *RuF3'H*, *RuFLS* (late genes  
490 of flavonol-anthocyanin pathway), and *RuANS* were overexpressed in control plants.  
491 *RuCHS*, *RuF3H* (early steps), *RuLAR*, (catechin pathway), and *RuDFR* (anthocyanin  
492 pathway) were significantly overexpressed in QV15 treated plants. It was also found  
493 that *RuGST2* (glutathione S transferase 1) was overexpressed in control plants, while  
494 *RuGST1* (glutathione S transferase 2) was overexpressed in QV15 treated plants (table  
495 S2). In QV15 inoculated plants, the transcription factor *RuMYB5* was significantly

496 overexpressed, while *RuMYB1*, *RuMYB3*, *RuMYB4* and *RuMYB6* were overexpressed in  
497 controls (insert, Fig 6).

498 **Fig 6. Flavonol-Anthocyanin Pathway gene expression analyzed by RT-qPCR in**  
499 **fruits.** The line set at value of 1 represents gene expression in controls, so values over  
500 one indicate overexpression in QV15 treated plants and values below one indicate  
501 overexpression in controls Phenylalanine ammonio-lyase (*RuPAL1* and *RuPAL2*),  
502 Cinammate 4 hydroxylase (*RuC4H*), 4-coumaryl-CoA ligase (*Ru4CL*), Chalcone  
503 synthase (*RuCHS*), Chalcone Isomerase1 (*RuCH11*), Chalcone Isomerase2 (*RuCH12*),  
504 Flavonol-3-hydroxylase (*RuF3H*), Flavonoid 3'5'hydroxylase (*RuF3'5'H*), Flavonoid  
505 3'hydroxylase (*RuF3'H*), Flavonol synthase (*RuFLS*), Leucoanthocyanidin reductase  
506 (*RuLAR*), Anthocyanidin reductase (*RuANR*), Dehydroflavonol reductase (*RuDFR*),  
507 Anthocyanidin synthase (*RuANS*). Insert: Flavonol-anthocyanin pathway regulatory  
508 genes. Asterisks indicate significant differences, according to Fisher test ( $p < 0.05$ ).

## 509 **Discussion**

510 The results presented in this study indicate that QV15 triggers plant metabolism,  
511 improving plant fitness, adaptation to biotic stress and stimulating the flavonol-  
512 anthocyanin pathway in blackberry.

513 The responses triggered by this strain in the plant involves activation of gene  
514 expression related to photosynthesis and oxidative stress and specialized protective  
515 enzymes. The abundant transcripts related to photosynthesis found in leaves of QV15  
516 treated plants reflect an active system for light reactions, an improvement in the  
517 efficiency of the photosynthetic electron transport chain, supported by overexpressed  
518 genes related to biosynthesis of photosynthetic pigments, mainly chlorophylls A and B.

519 This expression is consistent with the significantly higher levels in chlorophylls and  
520 carotenoids of QV15-treated plants (table 2), also reported for other *Bacillus* strains  
521 [41]. Furthermore, the UHPLC/ESI-qTOF-MS analysis indicated lower levels of  
522 chlorophyll breakdown products in elicited plants, so the positive effects on pigments  
523 could be explained by either an increased biosynthesis, or a decreased degradation, or  
524 both (Fig 4, table 2). The high activity of light reactions seems to be coordinated with  
525 an active carbon fixation, as overexpressed transcripts of ribulose biphosphate  
526 carboxylase (RuBisCO) are found. Also consistent with the high activity of light  
527 reactions, abundant transcripts of the enzymatic pool of antioxidants were also observed  
528 and overexpressed in QV15 treated plants (supplementary material) suggesting a  
529 protective role against oxidative stress, and confirming enhanced plant fitness [42-43].  
530 A striking overexpression of the isoenzyme glutathione-S-transferase (GST2), an  
531 enzyme with a strong protective role against oxidative stress, contributes to the  
532 enhanced plant fitness, as it is consistent with the high expression of the enzymatic pool  
533 of antioxidants. Furthermore, GST has been reported to be a molecular marker of  
534 induced resistance signaling mediated by ethylene in *A.thaliana* [44] and strongly  
535 related to phenylpropanoid-flavonoid transport within the plant [17].

536 Overexpressed genes in fruits, in one hand, reveal high vacuolar activity and an  
537 active sucrose metabolism, and in the other hand, the strong stress defense response and  
538 cell death is reflected in the many transcripts of ubiquitin-protein ligases, serin/theronin  
539 kinases and Fbox/FBD/LRRs [45] in controls, that in fact show a higher disease  
540 incidence. The F-box genes constitute one of the largest gene families in plants involved  
541 in degradation of cellular proteins. F-box proteins can recognize a wide array of  
542 substrates and regulate many important biological processes as among which are biotic  
543 and abiotic stress responses. Conversely, in QV15-treated fruits, defense response relies



544 on specialized defense enzymes such as subtilisin, glucanases and chitinases [46], and a  
545 striking overexpression of GDSL esterase/lipases, a family of proteins that has been  
546 related to secondary metabolites synthesis and plant defense [47]. This reveals the  
547 different pathways involved in protection and highlights the systemic response in  
548 QV15.

549         Stimulating the photosynthetic process suggests that the increase in the carbon  
550 fixed will be fed into growing leaves, flowers, and fruits, enhancing plant growth and  
551 probably increasing fruit yield, as reported for some beneficial bacterial strains [11-43].  
552 This active metabolism provides a metabolic support to the high increase of flowers  
553 recorded which should be translated into a fruit yield increase. However, no significant  
554 increases in fruit yield were detected probably due to the Mildew outbreak after  
555 flowering, in which QV15 treated plants showed less disease symptoms than controls,  
556 with a protection that ranged between 87 to 68% along plant cycle (Table 1) [48]. That  
557 protection involves deviation of plant resources to plant defense, therefore  
558 compromising plant yield as balancing immunity and plant yield is the key for survival  
559 [49].

560         Our rationale was to demonstrate the role of flavonoids in adaptation to biotic  
561 stress, with a double aim, i) protection and ii) fruit quality. On one hand, to stimulate  
562 flavonoid synthesis on leaves to improve plant defense, as these secondary metabolites  
563 have been reported to play a relevant role in defense, being of great importance against  
564 biotic stress [51-52]. On the other hand, to benefit from this stimulation to enrich fruits  
565 on flavonoids and anthocyanin contents [52] as they are bioactive molecules good to  
566 prevent onset of disease [53]. More precisely, the flavonoids reported here, refer to the  
567 profile of total phenolics, flavonols and anthocyanins.

568 Flavonoids may alternatively play a role as phytoalexins or phytoanticipins,  
569 depending on the plant species, or even within different tissues of the same plant [25-  
570 54]. An increase upon pathogen challenge would indicate a role as phytoalexins, [55]  
571 while a decrease upon pathogen challenge would indicate a phytoanticipin role [24].  
572 Moreover, the aglycons of flavonols have been reported to be more effective against  
573 fungi than their methyl derivatives [56-57] while flavanes, proanthocyanidins and  
574 isoflavones have been reported to be more effective against bacteria [58]. In control  
575 plants, flavonols were higher than in QV15 treated plants; this situation would indicate  
576 a role as phytoalexins in blackberry leaves, as flavonols increase in response to  
577 pathogen elicitors [54].

578 However, despite the lower flavonol concentration found in leaves of QV15  
579 treated plants as well as that of total phenolics and anthocyanins (table 2), there was  
580 lower disease incidence. Consistent with the role of phytoanticipins, flavonols would be  
581 effectively transformed into another molecule, the phytoalexin, also resulting in lower  
582 flavonol levels in plant [54]. This statement is supported in part by the striking lower  
583 concentration in (-)-epicatechin and quercetin derivatives registered in QV15 treated  
584 leaves (table 4) and fruits (table 5), and overexpression of key genes in the pathway (Fig  
585 5 and 6). Interestingly, an noticeable accumulation of kempferol-3-rutinoside was  
586 detected (tables 4 and 5) only in QV15 treated plants, suggesting a putative role in  
587 defense which is worth exploring since differential effects of each type of flavonol have  
588 been reported [59]. Irrespective of the fate of each molecule, the net balance of flavonol  
589 pool results in lower concentration in QV15 treated plants, which still remain more  
590 protected. As regards to fruits, no differences were found between controls and QV15-  
591 treated fruits in neither bioactive concentration, and still, Kempferol-3-rutinoside was  
592 strikingly high as in leaves, reinforcing the notion of a relevant role of this molecule.

593 Transcript profiling revealed coordinated increased transcript abundance for  
594 genes encoding enzymes of committing steps in the flavonol-anthocyanin pathway as  
595 well as in the regulators in QV15 treated plants, which was different in leaves and fruits.  
596 In leaves, only *Ru4CL* and *RuF3H*, the last enzymes in the phenylpropanoid pathway  
597 (*Ru4CL*), and last in the early flavonol-anthocyanin pathway (*RuF3H*), respectively,  
598 were overexpressed, suggesting a pivotal role for F3H in the control of the flavonol-  
599 anthocyanin pathway, consistent with the before mentioned metabolomic changes. The  
600 overexpression of key genes in the pathways ensures the carbon flux to that metabolic  
601 cluster, as enzymes involved in this pathway have been reported to cluster associated to  
602 the ER membrane for a better performance [60]. In fruits, overexpression of first and  
603 last gene of the early flavonol biosynthetic genes, first of anthocyanins and first for  
604 catechins revealed an active anthocyanin biosynthesis in QV15 fruits, anticipating the  
605 massive biosynthesis that is about to occur upon complete fruit maturation [52]. As  
606 flavonol and anthocyanin concentration is significantly lower in leaves of QV15 plants,  
607 together with a high concentration of GST transcripts, we hypotesize that leaf flavonols  
608 are being actively translocated to support anthocyanin synthesis in fruits (16). This  
609 process was more effective under the influence of QV15. Interestingly, the homologous  
610 to the positive regulators of late steps in the flavonol-anthocyanin pathway, *RuMYB3*  
611 and *RuMYB5* [61] were overexpressed in leaves, and only *RuMYB5* was in fruits,  
612 reinforcing the hypothesis of flavonoids being actively formed in leaves while leaf  
613 anthocyanin synthesis is inhibited and is activated in fruits. This suggests that *RuMYB3*  
614 could behave as anthocyanin repressor in blackberry, as the mode of control of the  
615 flavonoid pathway is quite specific of the species and moment of development [61];  
616 furthermore, *RuMYB5* appears as the target for biotic stress adaptation used by this  
617 *Bacillus* strain.

618 Finally, the better performance in the inoculated plants against the pathogen  
619 could rely in other molecules, leaving a partial role in defense for flavonols, so the  
620 decrease would be due to translocation to fruits, to fulfill sink demand for anthocyanin  
621 biosynthesis, as they are vastly produced in leaves of blackberry plants [3]. Consistent  
622 with the partial role of flavonols in defense, the untargeted metabolomic profile  
623 revealed a characteristic series of triterpenoid pentacyclic saponins specific to the *Rubus*  
624 genus, ursanolic acids [40], which have been attributed to have an antimicrobial  
625 potential [62]; these compounds were more abundant in QV15 treated plants.

626 In summary, elicitation with QV15 has revealed a pivotal role of RuF3H  
627 controlling carbon fluxes towards the different sinks in the flavonol-anthocyanin  
628 pathway in blackberry and a relevant action of RuMYB5 in its control. The abundance  
629 of Kempferol-3-rutinoside leaves an open question about its role in defense. This C  
630 demand is supported by an activation of the photosynthetic machinery and boosted by a  
631 coordinated control of ROS into a sub-lethal range, in which GST2 seems to have a  
632 strong participation, and results in enhanced protection to biotic stress.

## 633 **Acknowledgements**

634 Authors thank for Agricola El Bosque S.L. “La Canastita” for providing help in  
635 blackberry crop

## 636 **References**

637 1.Thabti IW, Elfalleh N, Tlili M, Ziadi MG, Campos, Ferchichi A. Phenols, flavonoids  
638 and antioxidant and antibacterial activity of leaves and stem bark of *Morus* species. Intl  
639 J Food Prop. 2014;17(4):842-854. doi: 10.1080/10942912.2012.660722

- 640 2. Xi HF, Ma L, Wang LN, Li SH, Wang LJ. Differential response of the biosynthesis  
641 of resveratrols and flavonoids to UV-C irradiation in grape leaves. *New Zeal J Crop*  
642 *Hortic Sci.*2015; 43(3):163-172. doi: 10.1080/01140671.2014.989862.
- 643 3. Gutierrez E., García-Villaraco Velasco A, Lucas JA, Gutierrez-Mañero FJ, Ramos-  
644 Solano B. The flavonol-anthocyanin pathway in blackberry and arabidopsis: State of the  
645 art. In: Gonçalo C. Justino ed. *Flavonoids - from biosynthesis to human health*, InTech;  
646 2017. p 129-150
- 647 4. Brunetti C, Di Ferdinando M, Fini A, Pollastri S, Tattini M. Flavonoids as  
648 antioxidants and developmental regulators: Relative significance in plants and humans.  
649 *Intl J Molec Sci.* 2013;14 (2): 3540-3555 doi: 10.3390/ijms14023540.
- 650 5. Cassidy A. Berry anthocyanin intake and cardiovascular health. *Molec Aspects Med.*  
651 2017. doi: 10.1016/j.mam.2017.05.002.
- 652 6. Mouradov A, Spangenberg G. Flavonoids: a metabolic network mediating plants  
653 adaptation to their real estate. 2014 *Front. Plant Sci.* 5:16. doi: 10.3389/fpls.2014.00620
- 654 7. Oh MM, Trick HN, Rajashekara CB. Secondary metabolism and antioxidants are  
655 involved in environmental adaptation and stress tolerance in lettuce. *J Plant Physiol.*  
656 2009;166(2):180-191. doi: 10.1016/j.jplph.2008.04.015.
- 657 8. Wink M. Plant secondary metabolism: Diversity, function and its evolution. *Nat.*  
658 *Prod. Com.* 2008;3(8):1205-1216.
- 659 9. Algar E, Gutierrez-Mañero FJ, Bonilla A, Lucas JA, Radzki W, Ramos-Solano B.  
660 *Pseudomonas fluorescens* N21.4 Metabolites Enhance Secondary Metabolism

661 Isoflavones in Soybean (*Glycine max*) Calli Cultures. *J Agr Food Chem.* 2012; 60(44):  
662 11080-11087. doi: 10.1021/jf303334q.

663 10. Gutiérrez-Mañero FJ., García-Villaraco A, Lucas JA, Gutiérrez E, Ramos-Solano B.  
664 Inoculant / Elicitation Technology to Improve Bioactive/Phytoalexin Contents in  
665 Functional Foods. *Int J Curr Microbiol Appl Sci* 2012; 4(6):224-241.

666 11. Garcia-Seco D, Bonilla A, Algar E, Garcia-Villaraco A, Manero JG, Ramos-Solano  
667 B. Enhanced blackberry production using *Pseudomonas fluorescens* as elicitor. *Agron*  
668 *Sust Devel.* 2013; 33(2):385-392. doi: 10.1007/s13593-012-0103-z.

669 12. Shakya P, Marslin G, Siram K, Beerhues L, Franklin G. Elicitation as a tool to  
670 improve the profiles of high-value secondary metabolites and pharmacological  
671 properties of *Hypericum perforatum*. *J Pharm Pharmacol.* 2017.

672 13. Li XD, Wang YN, Chen S, Tian HQ, Fu DQ, Zhu BZ, Luo YB, Zhu HL. Lycopene  
673 Is Enriched in Tomato Fruit by CRISPR/Cas9-Mediated Multiplex Genome Editing.  
674 *Front. Plant Sci.* 2018;9. doi: 10.3389/fpls.2018.00559.

675 14. Bano A, Muqarab R. Plant defence induced by PGPR against *Spodoptera litura* in  
676 tomato (*Solanum lycopersicum* L.). *Plant Biol.* 2017; 19(3): 406-412. doi:  
677 10.1111/plb.12535.

678 15. Selvaraj T, Rajeshkumar S, Nisha MC, Wondimu L, Tesso M. Effect of *Glomus*  
679 *mosseae* and plant growth promoting rhizomicroorganisms (PGPR's) on growth,  
680 nutrients and content of secondary metabolites in *Begonia malabarica* Lam. *Maejo. Intl.*  
681 *J Sci Technol.* 2008; 2 (3):516-525.

- 682 16. Gutierrez E, García-Villaraco A, Lucas JA, Gradillas A, Gutierrez-Mañero FJ,  
683 Ramos-Solano B. Transcriptomics, Targeted Metabolomics and Gene Expression of  
684 Blackberry Leaves and Fruits Indicate Flavonoid Metabolic Flux from Leaf to Red  
685 Fruit. *Front Plant Sci.* 2017b; 8:472.
- 686 17. Biała W, Jasiński M. The Phenylpropanoid Case – It Is Transport That Matters.  
687 *Front Plant Sci.* 2018; 9:1610. doi: 10.3389/fpls.2018.01610.
- 688 18. Agati G, Brunetti C, Di Ferdinando M, Ferrini F, Pollastri S, Tattini M. Functional  
689 roles of flavonoids in photoprotection: New evidence, lessons from the past. *Pl Phys*  
690 *Biochem.* 2013;72:35-45. doi: 10.1016/j.plaphy.2013.03.014.
- 691 19. Bidart-Bouzat MG, Kliebenstein DJ. Differential levels of insect herbivory in the  
692 field associated with genotypic variation in glucosinolates in *Arabidopsis thaliana*. *J*  
693 *Chem Ecol.* 2008; 34 (8):1026-1037. doi: 10.1007/s10886-008-9498-z.
- 694 20. Cesco S, Mimmo T, Tonon G, Tomasi N, Pinton R, Terzano R, Neumann G,  
695 Weisskopf L, Renella G, Landi L, Nannipieri P. Plant-borne flavonoids released into the  
696 rhizosphere: impact on soil bio-activities related to plant nutrition. A review. *Biol Fertil*  
697 *Soils* 2012; 48(2):123-149. doi: 10.1007/s00374-011-0653-2.
- 698 21. Falcone Ferreyra ML, Rius SP, Casati P. Flavonoids: biosynthesis, biological  
699 functions, and biotechnological applications. *Front Plant Sci.* 2012; 3:222. doi:  
700 10.3389/fpls.2012.00222.
- 701 22. Jiang N, Doseff AI, Grotewold E. Flavones: From Biosynthesis to Health Benefits.  
702 *Plants* 2016; 5(2). doi: 10.3390/plants5020027.

703 23. Weston LA, Mathesius U. Flavonoids: Their Structure, Biosynthesis and Role in the  
704 Rhizosphere, Including Allelopathy. *J Chem Ecol.* 2013; 39(2):283-297. doi:  
705 10.1007/s10886-013-0248-5.

706 24. Algar E, Gutierrez-Manero FJ, Garcia-Villaraco A, Garcia-Seco D, Lucas JA,  
707 Ramos-Solano B. The role of isoflavone metabolism in plant protection depends on the  
708 rhizobacterial MAMP that triggers systemic resistance against *Xanthomonas*  
709 *axonopodis* pv. *glycines* in *Glycine max* (L.) Merr. cv. Osumi. *Pl Phys Biochem.* 2014;  
710 82:9-16. DOI: 10.1016/j.plaphy.2014.05.001.

711 25. Boue SM, Cleveland TE, Carter-Wientjes C, Shih BY, Bhatnagar D, McLachlan  
712 JM, Burow ME. Phytoalexin-Enriched Functional Foods. *J Agr Food Chem.* 2009; 57  
713 (7):2614-2622. doi: 10.1021/jf8040403.

714 26. Barriuso J, Pereyra MT, Garcia JAL, Megias M, Manero FJG, Ramos B. Screening  
715 for putative PGPR to improve establishment of the symbiosis *Lactarius deliciosus*-*Pinus*  
716 *sp.* *Microb Ecol.* 2005; 50(1):82-89. doi: 10.1007/s00248-004-0112-9.

717 27. Barriuso J, Solano BR, Manero FJG. Protection against pathogen and salt stress by  
718 four plant growth-promoting rhizobacteria isolated from *Pinus sp* on *Arabidopsis*  
719 *thaliana*. *Phytopathol.* 2008b; 98(6):666-672. doi: 10.1094/phyto-98-6-0666.

720 28. Barriuso J, Solano BR, Santamaria C, Daza A, Manero FJG. Effect of inoculation  
721 with putative plant growth-promoting rhizobacteria isolated from *Pinus spp.* on *Pinus*  
722 *pinea* growth, mycorrhization and rhizosphere microbial communities. *J Appl*  
723 *Microbiol.* 2008b; 105(5):1298-1309. doi: 10.1111/j.1365-2672.2008.03862.x.

724 29. Ramos-Solano B, Garcia-Villaraco A, Gutierrez-Manero FJ, Lucas JA, Bonilla A,  
725 Garcia-Seco D. Annual changes in bioactive contents and production in field-grown



726 blackberry after inoculation with *Pseudomonas fluorescens*. *Plant Physiol Biochem*  
727 2014; 74:1-8. doi: 10.1016/j.plaphy.2013.10.029.

728 30. Kim D, Pertea G, Trapnell C, Pimentel H, Kelley R, Salzberg SL TopHat2: accurate  
729 alignment of transcriptomes in the presence of insertions, deletions and gene fusions.  
730 *Genome Biol.* 2013; 14(4). doi: 10.1186/gb-2013-14-4-r36.

731 31. Li H, Handsaker B, Wysoker A, Fennell T, Ruan J, Homer N, Marth G, Abecasis G,  
732 Durbin R. *Proc Genome Project Data. The Sequence Alignment/Map format and*  
733 *SAMtools.* *Bioinformatics* 2009; 25(16):2078-2079 doi: 10.1093/bioinformatics/btp352.

734 32. Anders S, Pyl PT, Huber W. HTSeq—a Python framework to work with high-  
735 throughput sequencing data. 2015; 31(2),166-169.

736 33. Love MI, Huber W, Anders S. Moderated estimation of fold change and dispersion  
737 for RNA-seq data with DESeq2. *Genome Biol.* 2014; 15(12). doi: 10.1186/s13059-014-  
738 0550-8.

739 34. Benjamini Y, Hochberg Y. Controlling the false discovery rate-a practical and  
740 powerful approach to multiple testing. *J Royal Stat Soc Series B-Methodol.* 1995;  
741 57(1):289-300.

742 35. Bohm G, Amarante L, Bohm E, Rombaldi C, Genovese M. Glyphosate Influence on  
743 the Soil Microorganism Sensibility, Physiological Parameters of the Plant, Isoflavones  
744 and Residues in the Seeds and Soil. *J Agr Ecol Res Intl.* 2016; 5(4):1-12.  
745 doi:10.9734/JAERI/2016/22186.

- 746 36. Xu BJ, Chang SKC. A comparative study on phenolic profiles and antioxidant  
747 activities of legumes as affected by extraction solvents. *J Food Sci.* 2007; 72(2):S159-  
748 S166. doi: 10.1111/j.1750-3841.2006.00260.x.
- 749 37. Jia Z, Tang MC, Wu JM. The determination of flavonoid contents in mulberry and  
750 their scavenging effects on superoxide radicals. *Food Chem.* 1999; 64(4):555-559. doi:  
751 10.1016/s0308-8146(98)00102-2.
- 752 38. Giusti M, Wrolstad RE. Characterization and Measurement of Anthocyanins by  
753 UV-Visible Spectroscopy. In: *Cur.Protocols Food Anal.Chem.* doi:  
754 10.1002/0471142913.faf0102s00 (2001)
- 755 39. Livak KJ, TSchmittgen D. Analysis of relative gene expression data using real-time  
756 quantitative PCR and the 2(T)(-Delta Delta C) method. *Methods* 2001; 25(4):402-408.  
757 doi: 10.1006/meth.2001.1262.
- 758 40. Gradillas A, Martínez-Alcázar MP, Gutierrez E, Ramos-Solano B, Garcia A. A  
759 rapid and novel strategy for the characterization of the complex triterpene saponin  
760 mixture present in the methanolic extract of blackberry leaves (*Rubus* cv. Loch Ness)  
761 by LC-MS-TOF. *J Pharm Biomed Anal.* 2019; 164:47–56  
762 <https://doi.org/10.1016/j.jpba.2018.10.014> .
- 763 41. Seema T, Mehta K, Singh D. Studies on the effect of plant growth promoting  
764 rhizobacteria (PGPR) on growth, physiological parameters, yield and fruit quality of  
765 strawberry cv. chandler. *J Pharmacog Phytochem.* 2018; 2 (7).

- 766 42. Kim JS, Lee J, Seo SG, Lee C, Woo SY, Kim SH. Gene expression profile affected  
767 by volatiles of new plant growth promoting rhizobacteria, *Bacillus subtilis* strain JS, in  
768 tobacco. *Genes & Genomics* 2015; 37 (4):387-397. doi: 10.1007/s13258-015-0267-4.
- 769 43. Samaniego-Gamez Y, Blancka RG, Tun-Suarez JM, Kantun-Can J, Reyes-Ramirez  
770 A, Cervantes-Diaz L. *Bacillus* spp. inoculation improves photosystem II efficiency and  
771 enhances photosynthesis in pepper plants. *Chilean J. Agr. Res.* 2016; 76(4). doi:  
772 10.4067/s0718-2016.
- 773 44. Song GC, Ryu SY, Kim YS, Lee JY, Choi JS, Ryu CM. Elicitation of induced  
774 resistance against *Pectobacterium carotovorum* and *Pseudomonas syringae* by specific  
775 individual compounds derived from native Korean plant species. *Molecules* 2013;  
776 18(10):12877-12895.
- 777 45. Gupta S, Garg V, Kant C, Bhatia S. Genome-wide survey and expression analysis of  
778 F-box genes in chickpea *BMC Genomics*. 2015; 16(1):67. doi: 10.1186/s12864-015-  
779 1293-y.
- 780 46. Pieterse CMJ, Zamioudis C, Berendsen RL, Weller DM, Van Wees SCM, Bakker  
781 PAHM. Induced Systemic Resistance by Beneficial Microbes *Annu Rev Phytopathol.*  
782 2014; 52:347–75
- 783 47. Chepyshko H, Lai CP, Huang LM, Liu JH, Shaw JF. Multifunctionality and  
784 diversity of GDSL esterase/lipase gene family in rice (*Oryza sativa* L. japonica)  
785 genome: new insights from bioinformatics analysis. *BMC Genomics*. 2012;13:309. doi:  
786 10.1186/1471-2164-13-309.
- 787 48. Gutierrez-Albanchez E, García-Villaraco A, Lucas JA, Gutierrez FJ, Ramos-Solano  
788 B. Priming fingerprint induced by *Bacillus amyloliquefaciens* QV15, a common pattern

789 in *Arabidopsis thaliana* and in field-grown blackberry. *J Pl Interact.* 2018; 13(1): 398-  
790 408, DOI: 10.1080/17429145.2018.1484187.

791 49. Ning Y, Liu W, Wang GL. Balancing Immunity and Yield in Crop Plants. *Trends*  
792 *Plant Sci.* 2017; doi:10.1016/j.tplants.2017.09.010.

793 50. Koskimaki JJ, Hokkanen J, Jaakola M, Suorsa M, Tolonen A, Mattila S, Pirttila  
794 AM, Hohtola, A. Flavonoid biosynthesis and degradation play a role in early defence  
795 responses of bilberry (*Vaccinium myrtillus*) against biotic stress. *Eur J Plant Pathol.*  
796 2009; 125(4):629-640. doi: 10.1007/s10658-009-9511-6.

797 51. Makoi J, Belane AK, Chimphango SBM, Dakora FD. Seed flavonoids and  
798 anthocyanins as markers of enhanced plant defence in nodulated cowpea (*Vigna*  
799 *unguiculata* L. Walp.). *Field Crop Res.* 2010; 118(1):21-27. doi:  
800 10.1016/j.fcr.2010.03.012.

801 52. García-Seco D, Zhang Y, Gutierrez-Mañero FJ, Martin C, Ramos-Solano B.  
802 Application of *Pseudomonas fluorescens* to blackberry under field conditions improves  
803 fruit quality by modifying flavonoid metabolism. *PLoS ONE* 2015; 10:23. doi:  
804 10.1371/journal.pone.0142639.

805 53. Gutierrez- Albalanche E, Kirakosyan A, Bolling SF, García- Villaraco A,  
806 Gutierrez- Mañero FJ, Ramos- Solano B. Biotic elicitation as a tool to improve berry  
807 (Strawberry and Raspberry) extract potential on metabolic syndrome related enzymes in  
808 vitro. *J Sci Food Agr.* 2019; 99(6):2939-2946. doi.org/10.1002/jsfa.9507.

809 54. Taye-Desta K, Shin SC, Shim JH, Kim GS, Shin HC, Abd El-Aty AM. Flavonoid  
810 Variations in Pathogen-Infected Plants. *Front Nat Prod Chem.* 2016; 2:3-49.

- 811 55. Ahuja I, Kissen R, Bones AM. Phytoalexins in defense against pathogens. Trends  
812 Plant Sci. 2012; 17 (2):73-90. doi: 10.1016/j.tplants.2011.11.002.
- 813 56. Mierziak J, Kostyn K, Kulma A. Flavonoids as important molecules of plant  
814 interactions with the environment. Molecules 2014; 19(10):16240 -16265.
- 815 57. Weidenbörner M, Jha HC. Antifungal activity of flavonoids in relation to degree of  
816 hydroxylation, methoxylation and glycosidation. Acta Hortic. 1993; 381:702-709  
817 DOI: 10.17660/ActaHortic.1994.381.102.
- 818 58. Cushnie T, Tim P, Lamb AJ. Antimicrobial activity of flavonoids. Intl. J.  
819 Antimicrob Ag. 2005; 26(5):343-356.
- 820 59. Parvez MM, Tomita-Yokotani K, Fujii Y, Konishi T, Iwashina T. Effects of  
821 quercetin and its seven derivatives on the growth of *Arabidopsis thaliana* and  
822 *Neurospora crassa*. Biochem System Ecol. 2004; 32(7):631-635. doi:  
823 10.1016/j.bse.2003.12.002.
- 824 60. Nutzmans HW, Huang A, Osbourn A. Plant metabolic clusters - from genetics to  
825 genomics. New Phytol. 2016; 211(3):771-789. doi: 10.1111/nph.13981.
- 826 61. Liu J, Osbourn A, Pengda MA. MYB Transcription Factors as Regulators of  
827 Phenylpropanoid Metabolism in Plants. Mol. Plant 2015; 8(5):689-708. doi:  
828 10.1016/j.molp.2015.03.012.
- 829 62. Shibu Prasanth SCR, Chandran P. Phytochemical and antimicrobial analysis of leaf  
830 samples of different *Rubus* species. Intl J Chem Tech Res. 2017; 10(4):359-368.

831 **Supporting information (IF APPLICABLE)**

832 **S1 Fig. Blackberry fruits chromatograms.** Overlaid Chromatograms (positive  
833 and negative ion mode) obtained from LC/MS/TOFF analysis of the methanolic extract  
834 of BlackBerry fruit samples. Control samples are represented in green while QV15  
835 samples appear in red

836 **S1 Table.** Number of mappable samples and paired readings per sample

837 **S2 Table. Expression of Glutathione S transferases.** Glutathione S transferases  
838 gene expression analyzed by RT-qPCR in leaves and fruit. Asterisks indicate significant  
839 differences, according to Fisher test ( $p < 0.05$ ).

840 **S3 Table.** Primers designed to RT-qPCR expression analysis

841 **S1 File. Differentially expressed genes in leaves**

842 **S2 File. Differentially expressed genes in fruits**

843

844 **Figure Legends**

845 **Figure 1. Biosynthesis of anthocyanins, flavonols and catechins via the flavonoid**  
846 **pathway in *Rubus* cv. Loch Ness.** Phenylalanine ammonio-lyase (RuPAL1 and  
847 RuPAL2), Cinammate-4-hydroxylase (RuC4H), 4-coumaryl-CoA ligase (Ru4CL),  
848 Chalcone synthase (RuCHS), Chalcone Isomerase1 (RuCHI1), Chalcone Isomerase2  
849 (RuCHI2), Flavonol-3-hydroxylase (RuF3H), Flavonoid 3'5'hydroxylase (RuF3'5'H),  
850 Flavonoid 3'hydroxylase (RuF3'H), Flavonol synthase (RuFLS), Leucoanthocyanidin  
851 reductase (RuLAR), Anthocyanidin reductase (RuANR), Dehydroflavonol reductase

852 (RuDFR), Anthocyanidin synthase (RuANS), Flavonol and Anthocyanidin  
853 Glycosyltransferases (RuFLS and RuAGT).

854 **Figure 2. Heat Map and unsupervised hierarchical clustering by sample;** top 50  
855 genes with the largest coefficient of variation based on FPKM counts, a) in leaves b) in  
856 fruits

857 **Figure 3 Venn diagrams of overexpressed and common genes in blackberry leaves**  
858 **(a) and fruits (b) from control and QV15-treated plants**

859 **Figure 4. Overlaid Chromatograms (positive and negative ion mode) obtained from**  
860 **LC/MS/TOFF analysis of the methanolic extract of Blackberry leaf samples.** Control  
861 samples are represented in Green while QV15 samples appear in red

862 **Figure 5. Flavonol-Anthocyanin Pathway gene expression analyzed by RT-qPCR in**  
863 **blackberry leaves.** Phenylalanine ammonio-lyase (*RuPAL1* and *RuPAL2*), Cinammate 4  
864 hydroxylase (*RuC4H*), 4-coumaryl-CoA ligase (*Ru4CL*), Chalcone synthase (*RuCHS*),  
865 Chalcone Isomerase1 (*RuCHI1*), Chalcone Isomerase2 (*RuCHI2*), Flavonol-3-  
866 hydroxylase (*RuF3H*), Flavonoid 3'5'hydroxylase (*RuF3'5'H*), Flavonoid 3'hydroxylase  
867 (*RuF3'H*), Flavonol synthase (*RuFLS*), Leucoanthocyanidin reductase (*RuLAR*),  
868 Anthocyanidin reductase (*RuANR*), Dehydroflavonol reductase (*RuDFR*), Anthocyanidin  
869 synthase (*RuANS*). Insert: Flavonol-anthocyanin pathway regulatory genes. Asterisks  
870 indicate significant differences, according to Fisher test ( $p < 0.05$ ).

871 **Figure 6. Flavonol-Anthocyanin Pathway gene expression analyzed by RT-qPCR in**  
872 **blackberry fruits.** Phenylalanine ammonio-lyase (*RuPAL1* and *RuPAL2*), Cinammate 4  
873 hydroxylase (*RuC4H*), 4-coumaryl-CoA ligase (*Ru4CL*), Chalcone synthase (*RuCHS*),  
874 Chalcone Isomerase1 (*RuCHI1*), Chalcone Isomerase2 (*RuCHI2*), Flavonol-3-

875 hydroxylase (*RuF3H*), Flavonoid 3'5'hydroxylase (*RuF3'5'H*), Flavonoid 3'hydroxylase  
876 (*RuF3'H*), Flavonol synthase (*RuFLS*), Leucoanthocyanidin reductase (*RuLAR*),  
877 Anthocyanidin reductase (*RuANR*), Dehydroflavonol reductase (*RuDFR*), Anthocyanidin  
878 synthase (*RuANS*). Insert: Flavonol-anthocyanin pathway regulatory genes. Asterisks  
879 indicate significant differences, according to Fisher test ( $p < 0.05$ ).



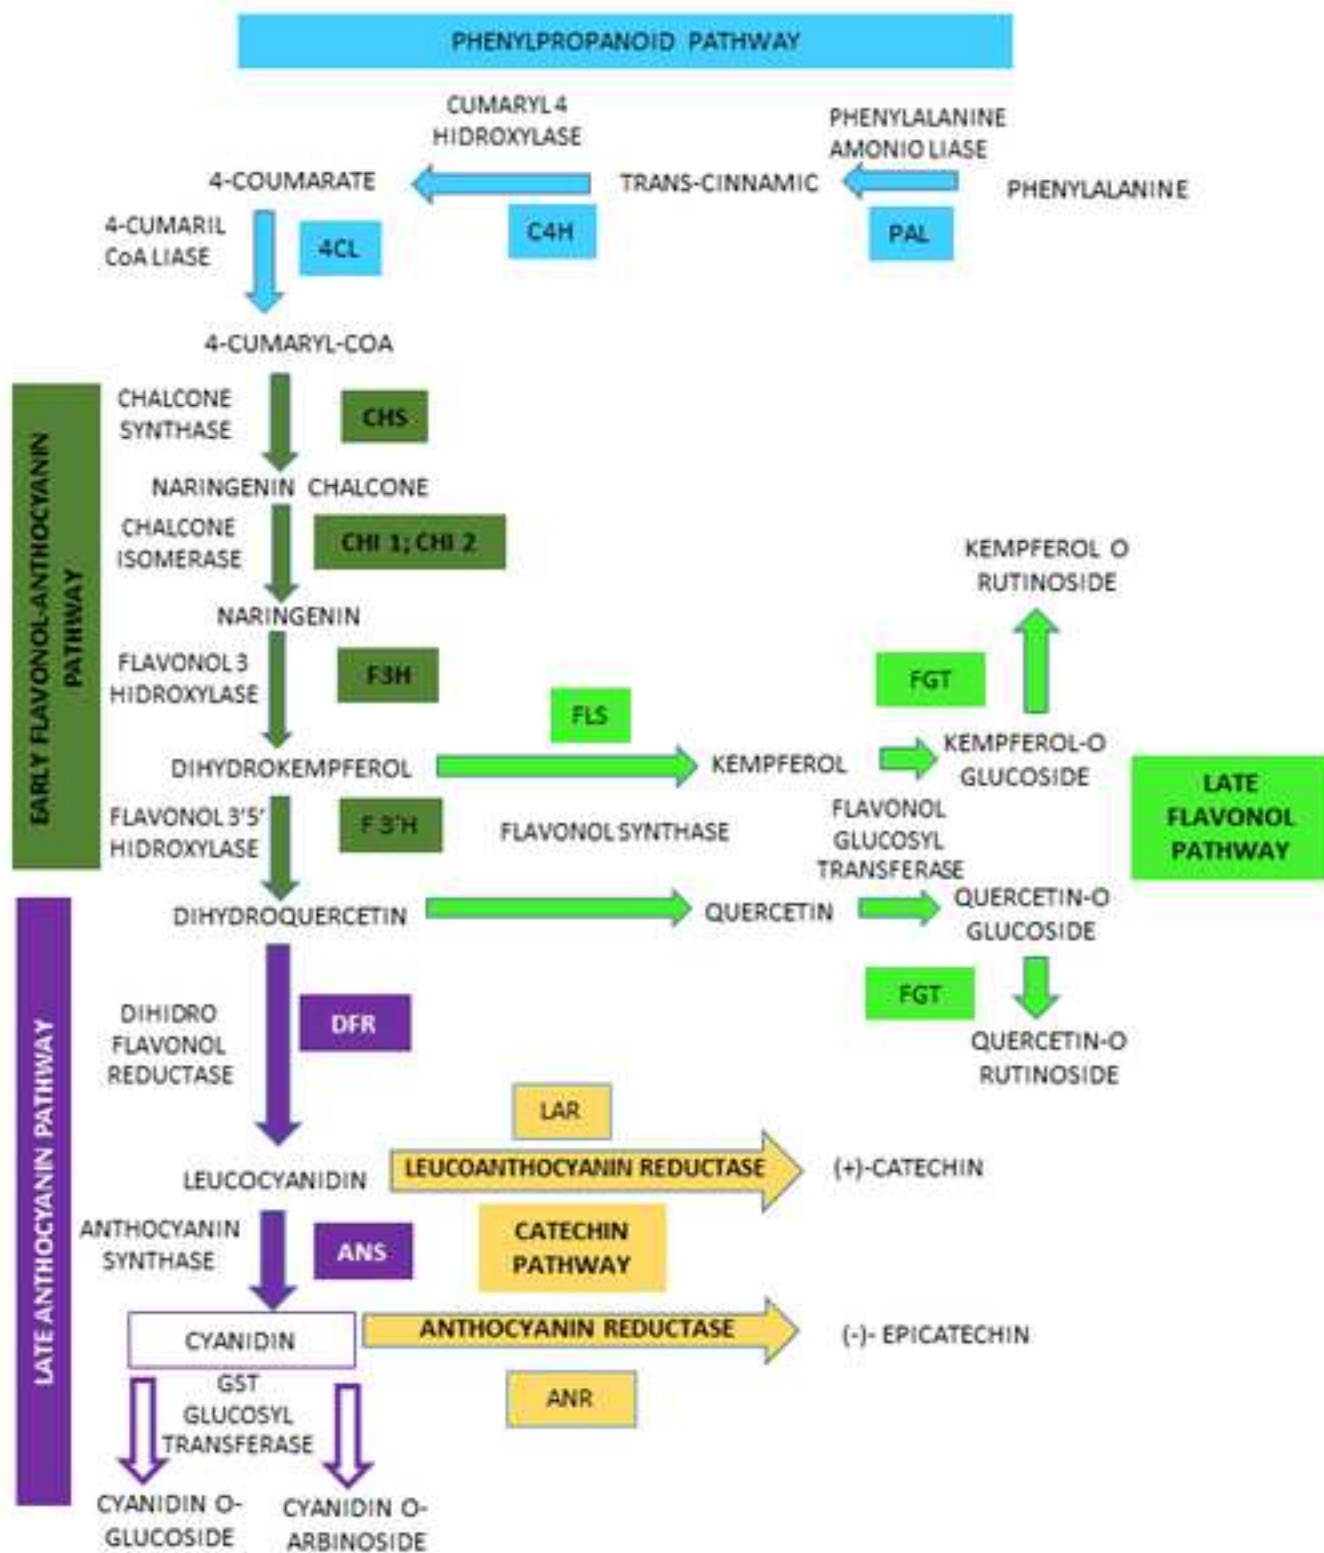

Figure 2. Heatmaps

[Click here to download Figure Figure 2 heatmaps.tif](#)

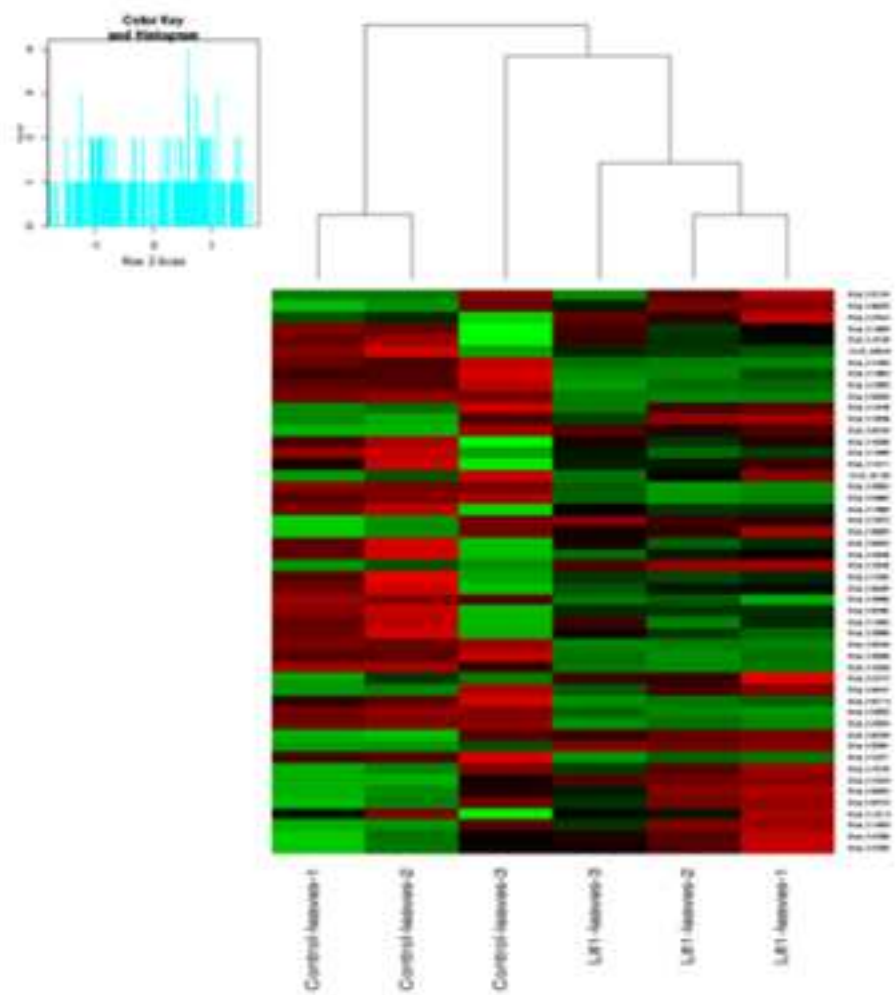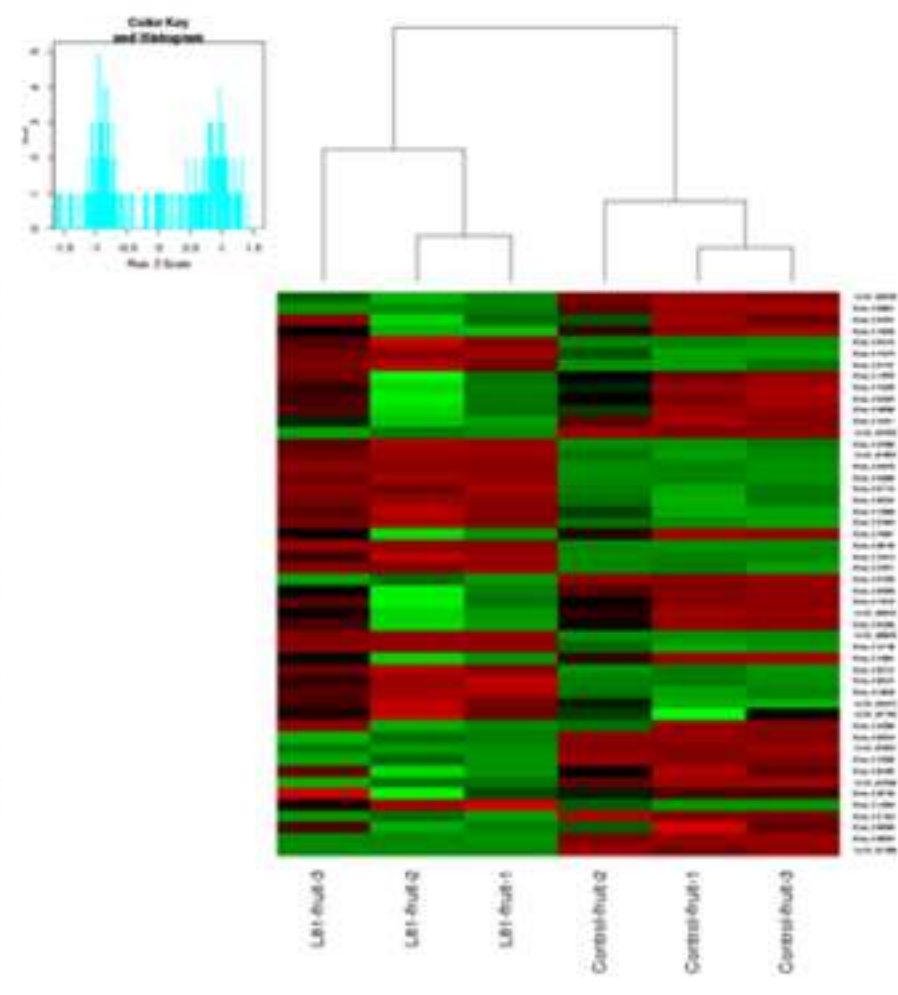

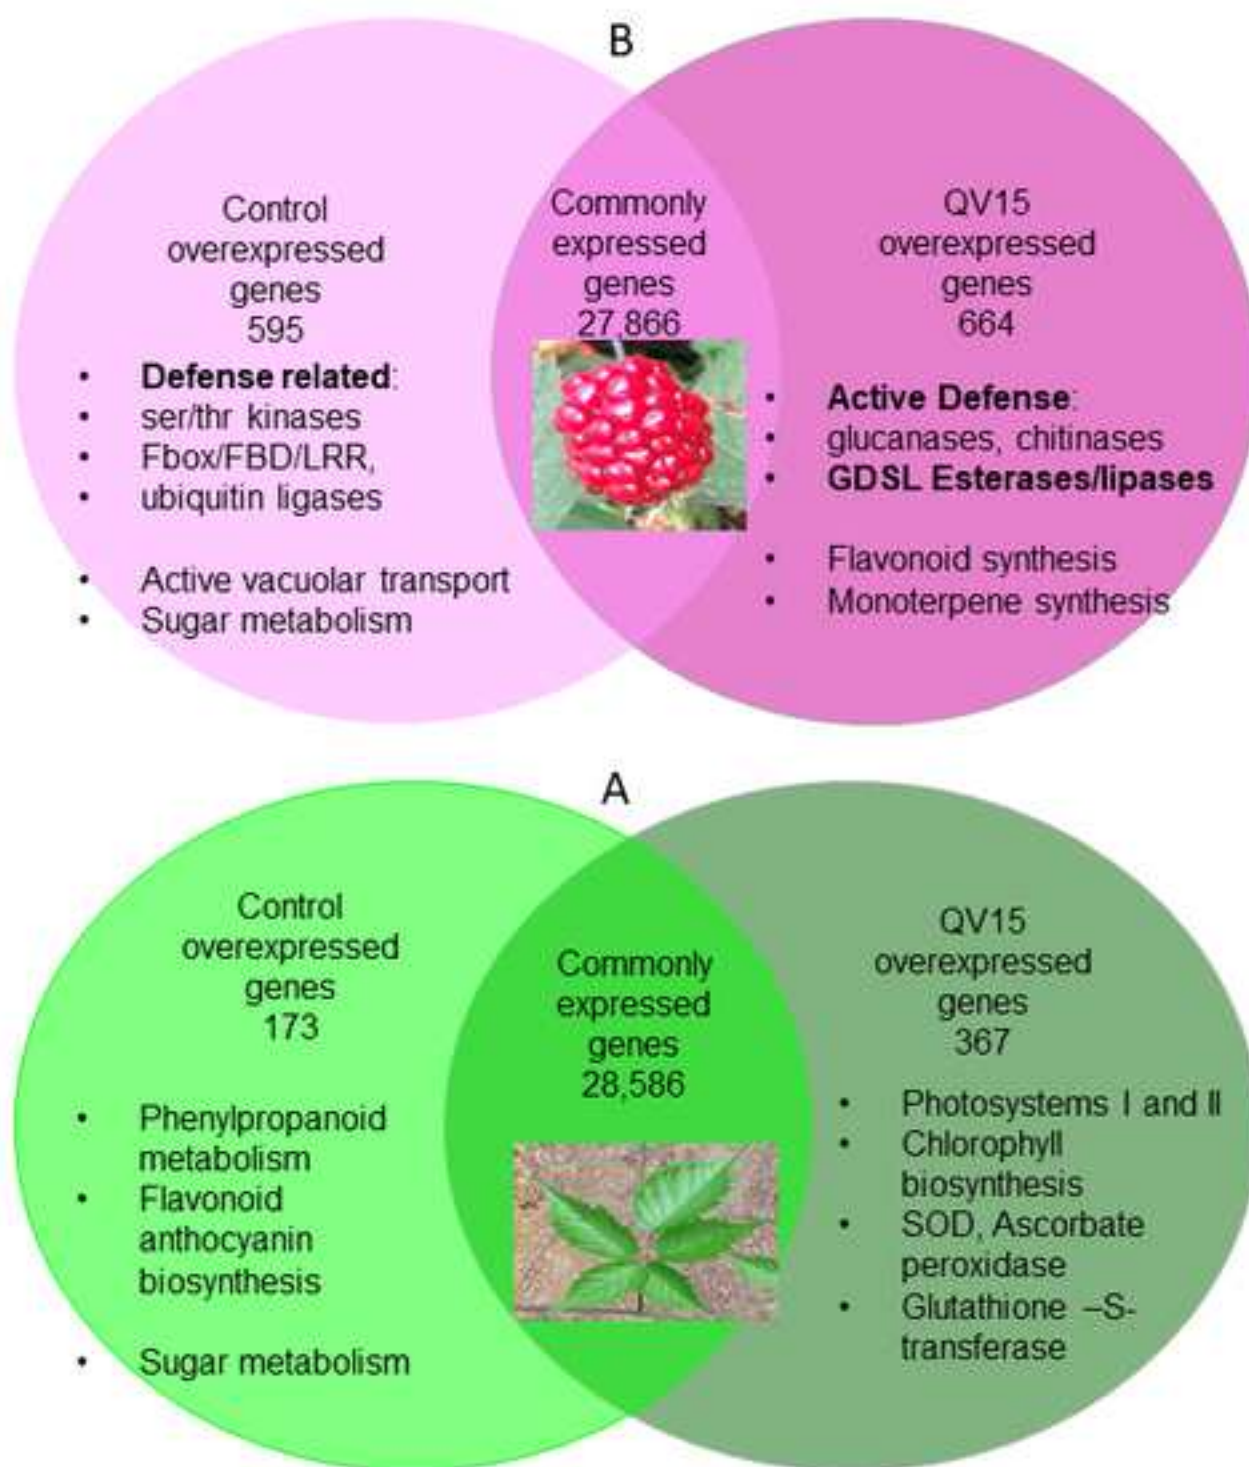

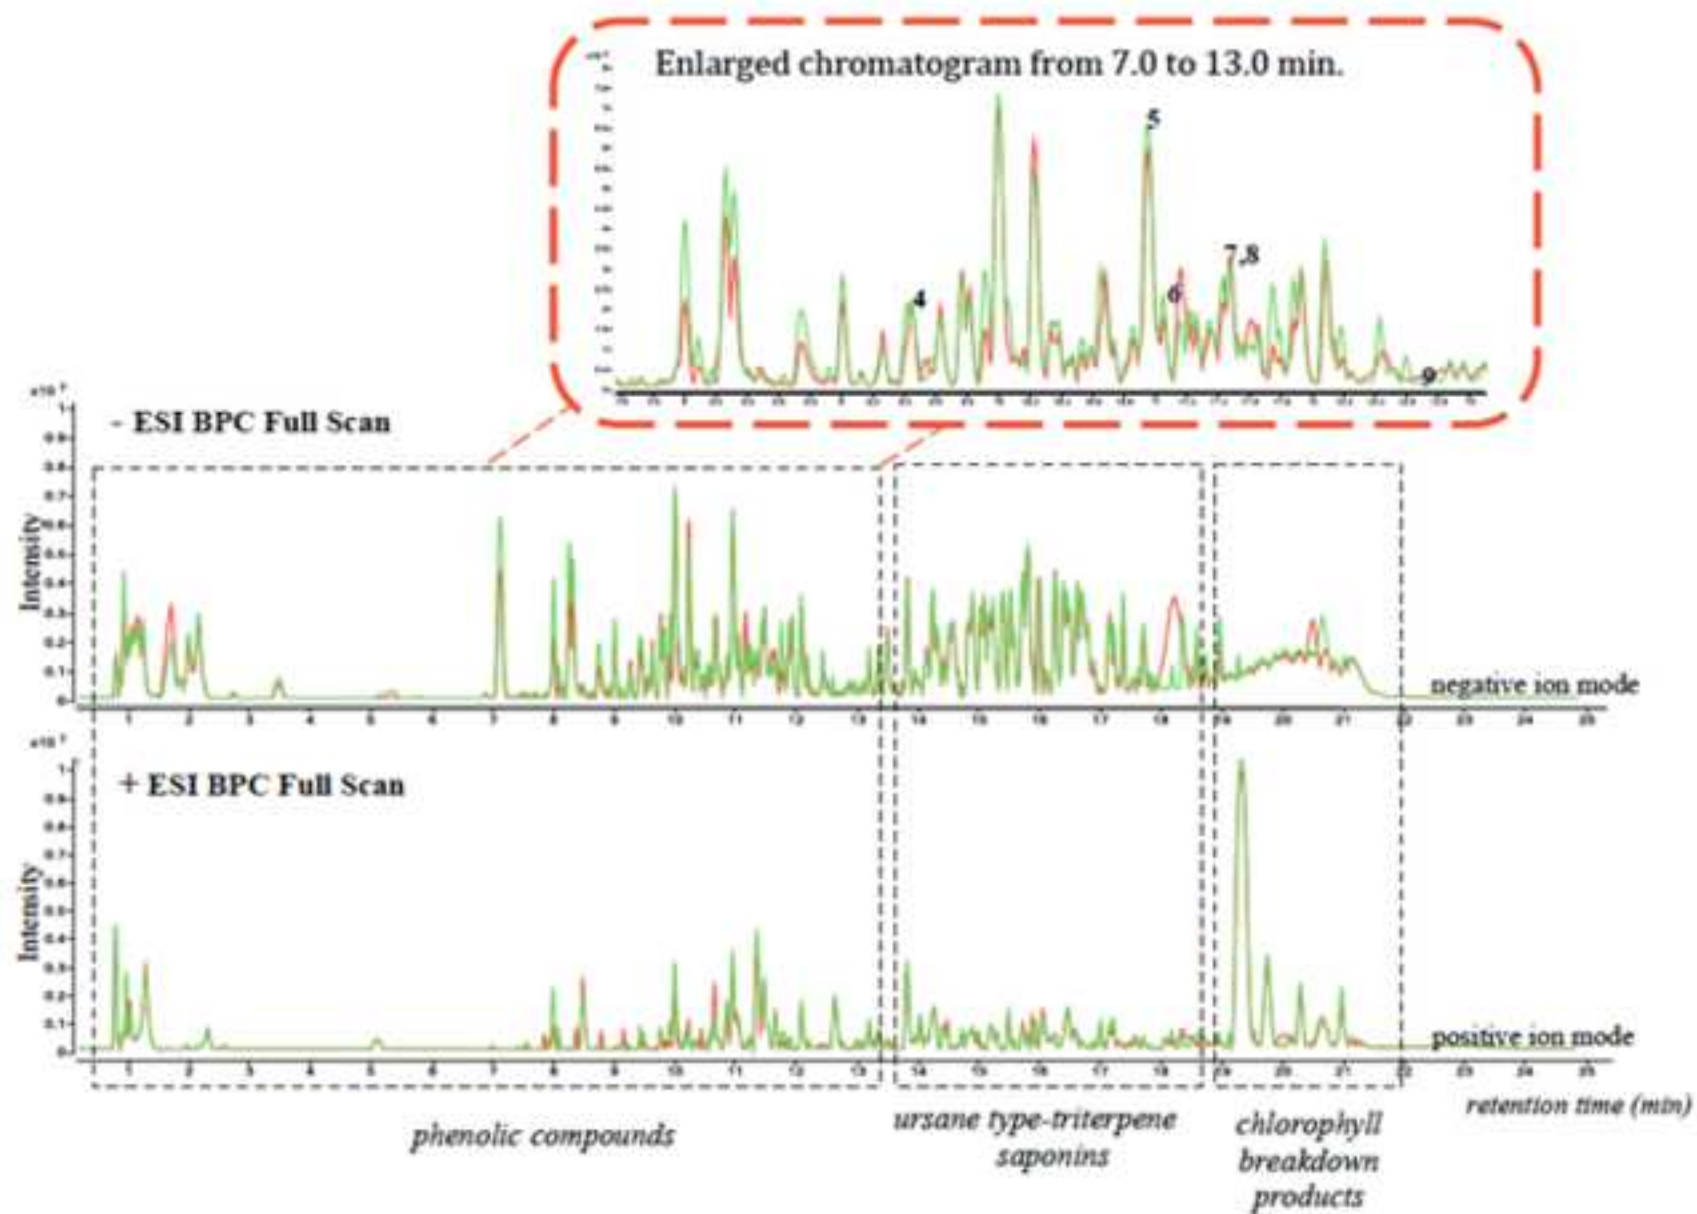

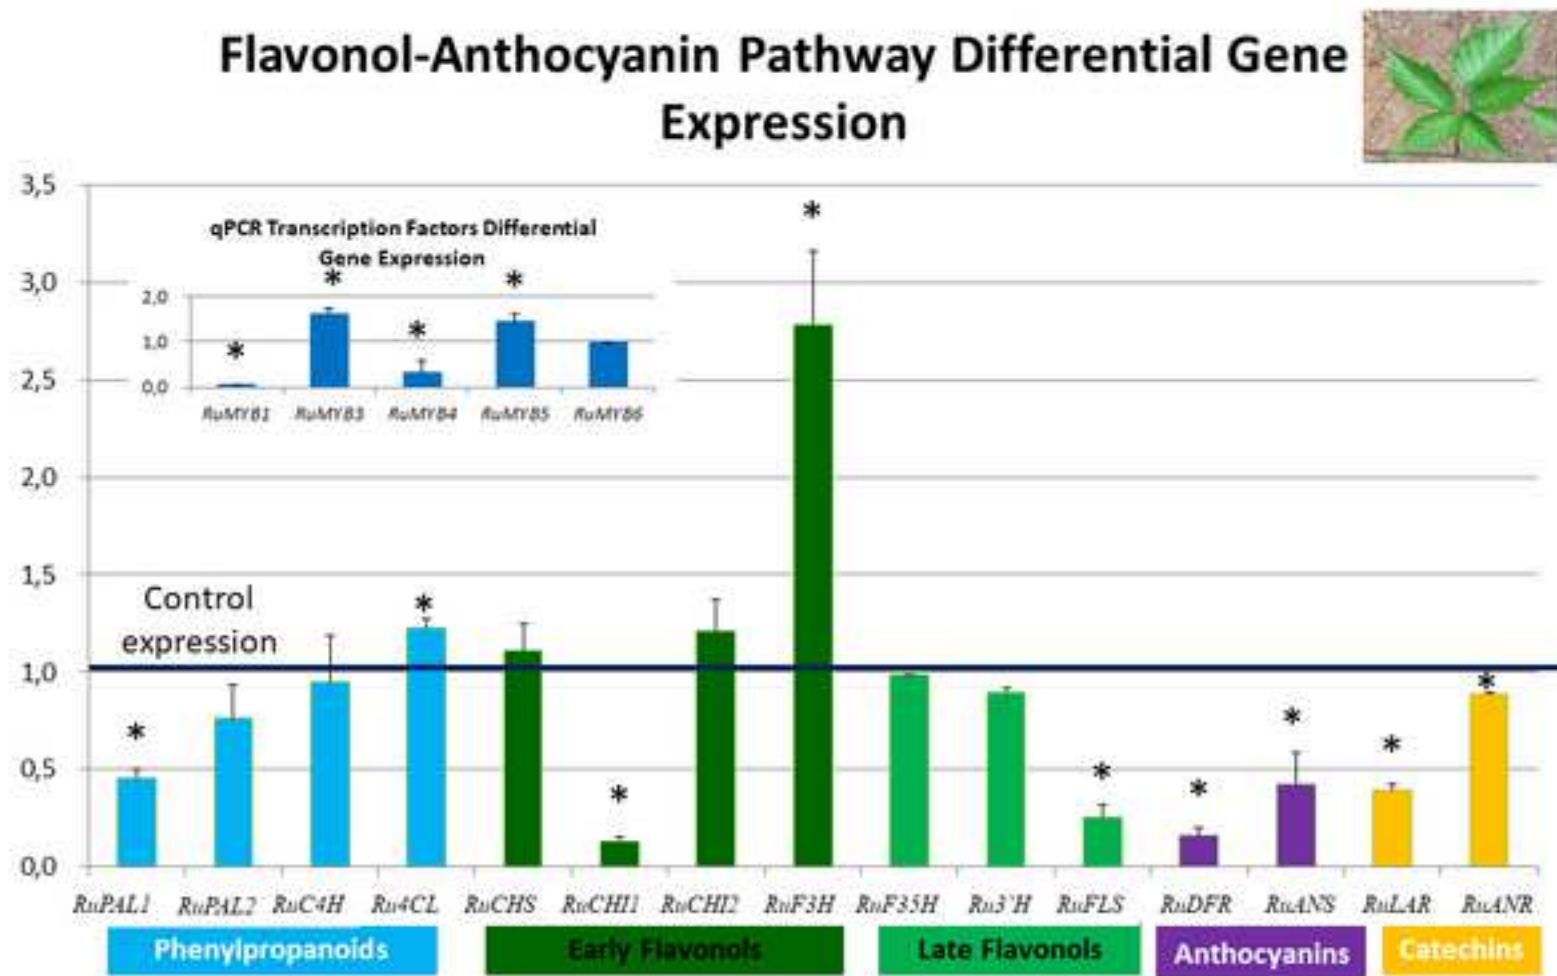

## Flavonol-Anthocyanin Pathway Differential Gene Expression

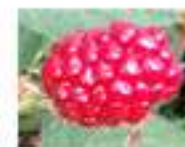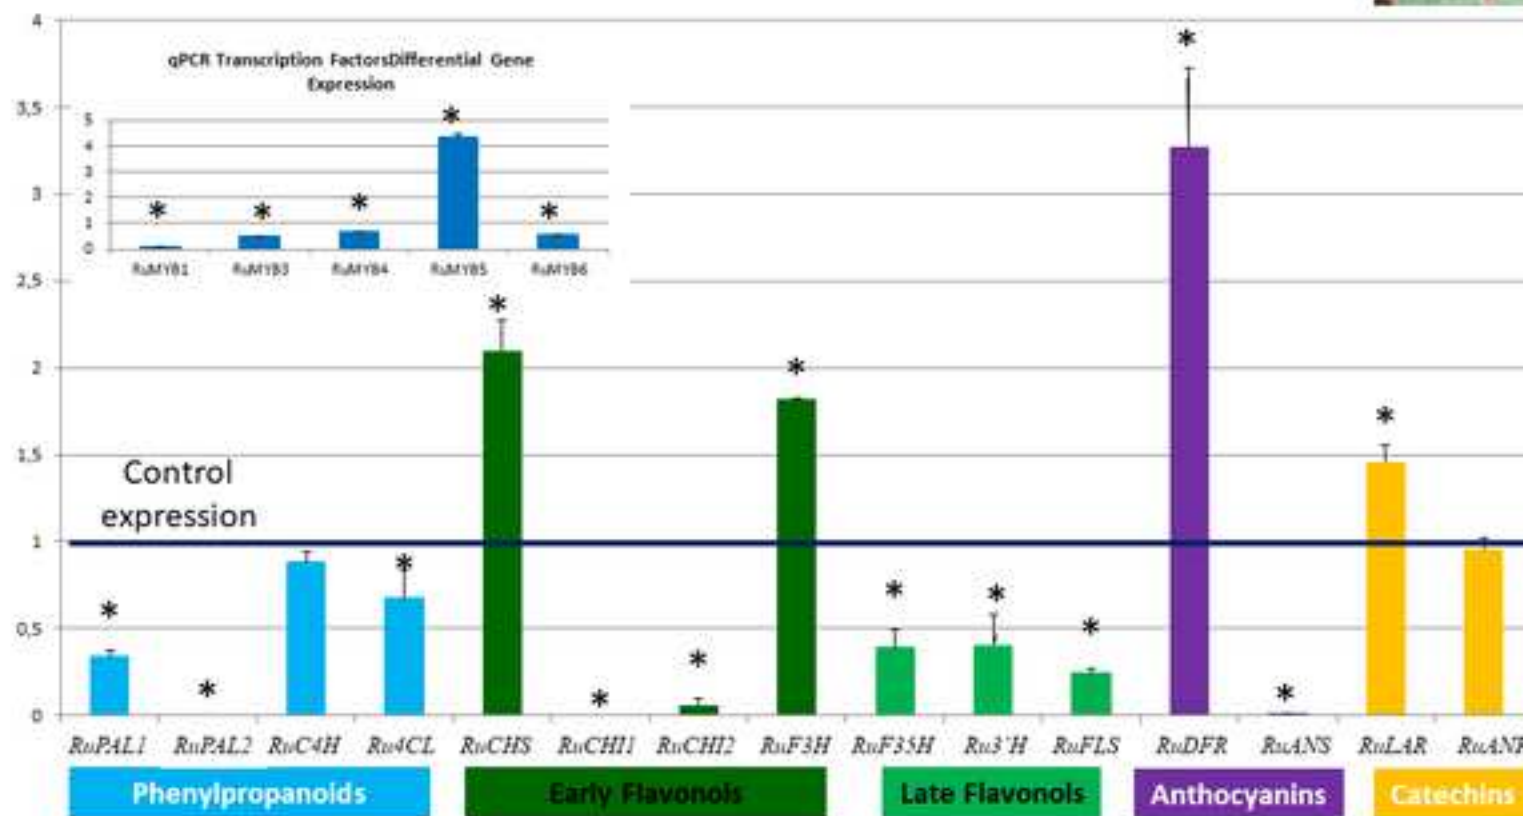

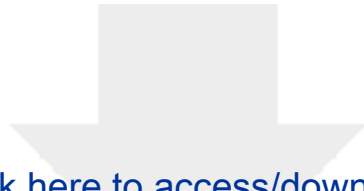

Click here to access/download

**Supporting Information**

1S Figure fruit chromatograms.tif

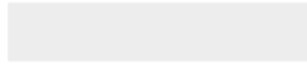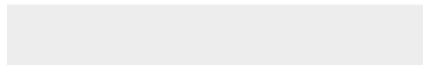



Click here to access/download  
**Supporting Information**  
S1\_Table. Ramos-Solano.docx

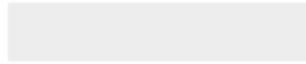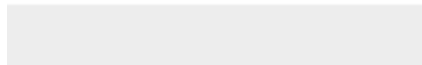





Click here to access/download  
**Supporting Information**  
S2\_Table. Ramos-Solano.docx

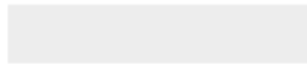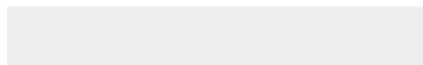



Click here to access/download  
**Supporting Information**  
S3\_Table. Ramos-Solano.docx

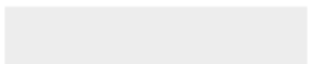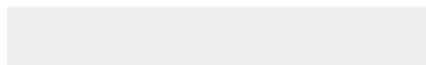

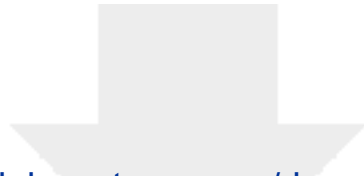

[Click here to access/download](#)

**Supporting Information**

[S1\\_File Leaves differentially expressed genes.xlsx](#)



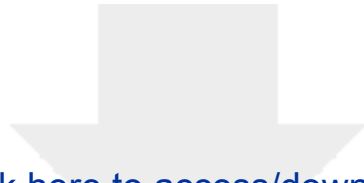

[Click here to access/download](#)

**Supporting Information**

[S2\\_File Fruits Differentially expressed Genes.xlsx](#)



Supplement: pone.0232626.s009.pdf [file pone.0232626.s009.pdf]
